# Supplementary material for: A temperature-dependent mechanical model to assess the stability of degrading permafrost rock slopes
Source: Copernicus journal article supplement (doi:10.5194/esurf-9-1125-2021), 2021-09-09
Supplement: Supplementary file 1 [file esurf-9-1125-2021-supplement.zip]

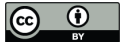

## *Supplement of*

# **A temperature-dependent mechanical model to assess the stability of degrading permafrost rock slopes**

**Philipp Mamot et al.**

*Correspondence to:* Philipp Mamot ([philipp.mamot@tum.de](mailto:philipp.mamot@tum.de))

- esurf-9-1125-2021-supplement-title-page.pdf
- Dataset S1. Joint geometrical properties\_Fig. 3\_Table 2.xlsx
- Dataset S10. JCS and basic friction angle\_Lab\_Table 5.xlsx
- Dataset S11. JRC\_Zugspitze crest\_Table 2.xlsx
- Dataset S12. Size of rock samples\_Table 3.xlsx
- Dataset S13. Warming rock samples\_Laboratory\_Fig. S5.xlsx
- Dataset S14. Results\_numerical model\_Fig. 6,7,8,9,S7,S8,S9.xlsx
- Dataset S15. Numerical code for UDEC
  - Simplified model
    - \* UniversalModel\_frozen\_rocktype\_60degr.uddat
    - \* UniversalModel\_frozen\_rocktype\_60degr\_fishcode.uddat
    - \* UniversalModel\_geometries\_diffslopeangles.uddat
    - \* UniversalModel\_jsorientation\_60degrees\_allorientations.dat
    - \* UniversalModel\_jsorientation\_basis\_60degr.uddat
    - \* UniversalModel\_persistence90\_60degr.uddat
    - \* UniversalModel\_persistence90\_60degr\_startatminus2.uddat
    - \* UniversalModel\_warming\_60degr.dat
  - Zugspitze model
    - \* Rock layers
    - \* Zugspitze\_stages1-4.dat
    - \* Zugspitze\_stages1-4\_D=1.dat
    - \* Zugspitze\_stages1-4\_newTop.txt
    - \* Zugspitze\_stages10-15\_thawing.dat
    - \* Zugspitze\_stages10-15\_thawing\_D=1.dat
    - \* Zugspitze\_stages10-15\_thawing\_NewTop.dat

- \* Zugspitze\_stages5-9\_warming.dat
- \* Zugspitze\_stages5-9\_warming\_D=1.dat
- \* Zugspitze\_stages5-9\_warming\_NewTop.dat
- \* mainshearzone\_line\_prof2.tab
- Dataset S16. Material parameters for different D\_Fig. S6.xlsx
- Dataset S2. Crack displacements\_Zugspitze crest\_Fig. S3.xlsx
- Dataset S3. ERT\_Fig. 4b
  - LIZGRIA1.LOG
  - LIZGRIA1.S4K
  - LIZGRIA1.TXT
  - Wen32mx\_1-2013-10-02-082113.dat
  - Wen32mx\_1-2013-10-02-090722.txt
- Dataset S4. ER\_Laboratory\_Fig. 4a.xlsx
- Dataset S5. Topography of ERT transect\_Fig. 4b.xlsx
- Dataset S6. Near-surface rock temperature\_Zugspitze crest\_Fig. S4.xlsx
- Dataset S7. Dilatational wave\_Lab\_Table 3.xlsx
- Dataset S8. Uniaxial compressive strength\_Lab\_Table 3.xlsx
- Dataset S9. Uniaxial tensile strength\_Lab\_Table 3.xlsx
- supplement.pdf

The copyright of individual parts of the supplement might differ from the article licence.
