# Supplementary material for: A temperature-dependent mechanical model to assess the stability of degrading permafrost rock slopes
Source: Copernicus journal article supplement (doi:10.5194/esurf-9-1125-2021), 2021-09-09
Supplement: Supplementary file 3 [file esurf-9-1125-2021-supplement.zip]

Archive with 54 entries (49 files):
- Dataset S14. Results_numerical model_Fig. 6,7,8,9,S7,S8,S9.xlsx
- Dataset S5. Topography of ERT transect_Fig. 4b.xlsx
- Dataset S6. Near-surface rock temperature_Zugspitze crest_Fig. S4.xlsx
- Dataset S12. Size of rock samples_Table 3.xlsx
- Dataset S15. Numerical code for UDEC/
- Dataset S15. Numerical code for UDEC/Simplified model/
- Dataset S15. Numerical code for UDEC/Simplified model/UniversalModel_persistence90_60degr_startatminus2.uddat
- Dataset S15. Numerical code for UDEC/Simplified model/UniversalModel_geometries_diffslopeangles.uddat
- Dataset S15. Numerical code for UDEC/Simplified model/UniversalModel_frozen_rocktype_60degr_fishcode.uddat
- Dataset S15. Numerical code for UDEC/Simplified model/UniversalModel_jsorientation_60degrees_allorientations.dat
- Dataset S15. Numerical code for UDEC/Simplified model/UniversalModel_jsorientation_basis_60degr.uddat
- Dataset S15. Numerical code for UDEC/Simplified model/UniversalModel_frozen_rocktype_60degr.uddat
- Dataset S15. Numerical code for UDEC/Simplified model/UniversalModel_warming_60degr.dat
- Dataset S15. Numerical code for UDEC/Simplified model/UniversalModel_persistence90_60degr.uddat
- Dataset S15. Numerical code for UDEC/Zugspitze model/
- Dataset S15. Numerical code for UDEC/Zugspitze model/Zugspitze_stages10-15_thawing_D=1.dat
- Dataset S15. Numerical code for UDEC/Zugspitze model/Zugspitze_stages5-9_warming_D=1.dat
- Dataset S15. Numerical code for UDEC/Zugspitze model/Rock layers/
- Dataset S15. Numerical code for UDEC/Zugspitze model/Rock layers/ThawLevel3_Line_Prof2.tab
- Dataset S15. Numerical code for UDEC/Zugspitze model/Rock layers/ThawLevel0_Line_NewTop.tab
- Dataset S15. Numerical code for UDEC/Zugspitze model/Rock layers/ThawLevel4_Line_Prof2.tab
- Dataset S15. Numerical code for UDEC/Zugspitze model/Rock layers/ThawLevel3_Line_NewTop.tab
- Dataset S15. Numerical code for UDEC/Zugspitze model/Rock layers/ThawLevel2_Line_NewTop.tab
- Dataset S15. Numerical code for UDEC/Zugspitze model/Rock layers/ThawLevel2_Line_Prof2.tab
- Dataset S15. Numerical code for UDEC/Zugspitze model/Rock layers/ThawLevel0_Line_Prof2.tab
- Dataset S15. Numerical code for UDEC/Zugspitze model/Rock layers/ThawLevel4_Line_NewTop.tab
- Dataset S15. Numerical code for UDEC/Zugspitze model/Rock layers/ThawLevel1_Line_NewTop.tab
- Dataset S15. Numerical code for UDEC/Zugspitze model/Rock layers/ThawLevel1_Line_Prof2.tab
- Dataset S15. Numerical code for UDEC/Zugspitze model/Zugspitze_stages1-4_newTop.txt
- Dataset S15. Numerical code for UDEC/Zugspitze model/Zugspitze_stages10-15_thawing_NewTop.dat
- Dataset S15. Numerical code for UDEC/Zugspitze model/Zugspitze_stages10-15_thawing.dat
- Dataset S15. Numerical code for UDEC/Zugspitze model/Zugspitze_stages1-4.dat
- Dataset S15. Numerical code for UDEC/Zugspitze model/Zugspitze_stages5-9_warming.dat
- Dataset S15. Numerical code for UDEC/Zugspitze model/Zugspitze_stages5-9_warming_NewTop.dat
- Dataset S15. Numerical code for UDEC/Zugspitze model/Zugspitze_stages1-4_D=1.dat
- Dataset S15. Numerical code for UDEC/Zugspitze model/mainshearzone_line_prof2.tab
- Dataset S13. Warming rock samples_Laboratory_Fig. S5.xlsx
- Dataset S2. Crack displacements_Zugspitze crest_Fig. S3.xlsx
- Dataset S10. JCS and basic friction angle_Lab_Table 5.xlsx
- Dataset S8. Uniaxial compressive strength_Lab_Table 3.xlsx
- Dataset S1. Joint geometrical properties_Fig. 3_Table 2.xlsx
- Dataset S16. Material parameters for different D_Fig. S6.xlsx
- Dataset S7. Dilatational wave_Lab_Table 3.xlsx
- Dataset S3. ERT_Fig. 4b/
- Dataset S3. ERT_Fig. 4b/LIZGRIA1.LOG
- Dataset S3. ERT_Fig. 4b/Wen32mx_1-2013-10-02-090722.txt
- Dataset S3. ERT_Fig. 4b/LIZGRIA1.TXT
- Dataset S3. ERT_Fig. 4b/LIZGRIA1.S4K
- Dataset S3. ERT_Fig. 4b/Wen32mx_1-2013-10-02-082113.dat
- supplement.pdf
- Dataset S11. JRC_Zugspitze crest_Table 2.xlsx
- esurf-9-1125-2021-supplement-title-page.pdf
- Dataset S9. Uniaxial tensile strength_Lab_Table 3.xlsx
- Dataset S4. ER_Laboratory_Fig. 4a.xlsx
