# Supplementary material for: A temperature-dependent mechanical model to assess the stability of degrading permafrost rock slopes
Source: Copernicus journal article supplement (doi:10.5194/esurf-9-1125-2021), 2021-09-09
Supplement: Supplementary file 3 [file esurf-9-1125-2021-supplement.zip › Dataset S3. ERT_Fig. 4b/Wen32mx_1-2013-10-02-082113.dat]

Project12 Wen32mx_1
2.50
11
1
Type of measurement (0=app.resistivity,1=resistance)
1
163
2
0
4 5.00 0.00 12.50 0.00 7.50 0.00 10.00 0.00 1920.6
4 2.50 0.00 17.50 0.00 7.50 0.00 12.50 0.00 743.419
4 0.00 0.00 22.50 0.00 7.50 0.00 15.00 0.00 618.99
4 7.50 0.00 15.00 0.00 10.00 0.00 12.50 0.00 1729.22
4 5.00 0.00 20.00 0.00 10.00 0.00 15.00 0.00 625.569
4 2.50 0.00 25.00 0.00 10.00 0.00 17.50 0.00 517.89
4 7.50 0.00 22.50 0.00 12.50 0.00 17.50 0.00 662.385
4 5.00 0.00 27.50 0.00 12.50 0.00 20.00 0.00 667.959
4 12.50 0.00 20.00 0.00 15.00 0.00 17.50 0.00 1857.1
4 15.00 0.00 22.50 0.00 17.50 0.00 20.00 0.00 3128.17
4 7.50 0.00 30.00 0.00 15.00 0.00 22.50 0.00 596.368
4 5.00 0.00 35.00 0.00 15.00 0.00 25.00 0.00 568.08
4 12.50 0.00 27.50 0.00 17.50 0.00 22.50 0.00 911.51
4 17.50 0.00 25.00 0.00 20.00 0.00 22.50 0.00 892.659
4 15.00 0.00 30.00 0.00 20.00 0.00 25.00 0.00 911.421
4 12.50 0.00 35.00 0.00 20.00 0.00 27.50 0.00 568.726
4 5.00 0.00 42.50 0.00 17.50 0.00 30.00 0.00 582.269
4 20.00 0.00 27.50 0.00 22.50 0.00 25.00 0.00 1766.19
4 2.50 0.00 47.50 0.00 17.50 0.00 32.50 0.00 349.24
4 22.50 0.00 30.00 0.00 25.00 0.00 27.50 0.00 1303.46
4 12.50 0.00 42.50 0.00 22.50 0.00 32.50 0.00 682.907
4 20.00 0.00 35.00 0.00 25.00 0.00 30.00 0.00 864.302
4 2.50 0.00 55.00 0.00 20.00 0.00 37.50 0.00 335.55
4 22.50 0.00 37.50 0.00 27.50 0.00 32.50 0.00 1092.51
4 5.00 0.00 57.50 0.00 22.50 0.00 40.00 0.00 368.743
4 27.50 0.00 35.00 0.00 30.00 0.00 32.50 0.00 1585.49
4 20.00 0.00 42.50 0.00 27.50 0.00 35.00 0.00 919.531
4 2.50 0.00 62.50 0.00 22.50 0.00 42.50 0.00 355.947
4 17.50 0.00 47.50 0.00 27.50 0.00 37.50 0.00 533.733
4 15.00 0.00 52.50 0.00 27.50 0.00 40.00 0.00 311.848
4 7.50 0.00 60.00 0.00 25.00 0.00 42.50 0.00 394.61
4 20.00 0.00 50.00 0.00 30.00 0.00 40.00 0.00 474.586
4 27.50 0.00 42.50 0.00 32.50 0.00 37.50 0.00 1441.16
4 12.50 0.00 57.50 0.00 27.50 0.00 42.50 0.00 462.021
4 25.00 0.00 47.50 0.00 32.50 0.00 40.00 0.00 785.011
4 7.50 0.00 67.50 0.00 27.50 0.00 47.50 0.00 296.355
4 22.50 0.00 52.50 0.00 32.50 0.00 42.50 0.00 344.079
4 0.00 0.00 75.00 0.00 25.00 0.00 50.00 0.00 209.252
4 5.00 0.00 72.50 0.00 27.50 0.00 50.00 0.00 256.416
4 35.00 0.00 42.50 0.00 37.50 0.00 40.00 0.00 1839.1
4 17.50 0.00 62.50 0.00 32.50 0.00 47.50 0.00 412.544
4 2.50 0.00 77.50 0.00 27.50 0.00 52.50 0.00 965.045
4 22.50 0.00 60.00 0.00 35.00 0.00 47.50 0.00 447.779
4 15.00 0.00 67.50 0.00 32.50 0.00 50.00 0.00 237.9
4 7.50 0.00 75.00 0.00 30.00 0.00 52.50 0.00 275.667
4 20.00 0.00 65.00 0.00 35.00 0.00 50.00 0.00 251.017
4 27.50 0.00 57.50 0.00 37.50 0.00 47.50 0.00 829.462
4 12.50 0.00 72.50 0.00 32.50 0.00 52.50 0.00 123.841
4 5.00 0.00 80.00 0.00 30.00 0.00 55.00 0.00 282.092
4 25.00 0.00 62.50 0.00 37.50 0.00 50.00 0.00 415.351
4 10.00 0.00 77.50 0.00 32.50 0.00 55.00 0.00 259.856
4 2.50 0.00 85.00 0.00 30.00 0.00 57.50 0.00 238.544
4 7.50 0.00 82.50 0.00 32.50 0.00 57.50 0.00 263.661
4 0.00 0.00 90.00 0.00 30.00 0.00 60.00 0.00 200.208
4 22.50 0.00 67.50 0.00 37.50 0.00 52.50 0.00 615.246
4 15.00 0.00 75.00 0.00 35.00 0.00 55.00 0.00 259.677
4 12.50 0.00 80.00 0.00 35.00 0.00 57.50 0.00 242.582
4 5.00 0.00 87.50 0.00 32.50 0.00 60.00 0.00 265.374
4 35.00 0.00 57.50 0.00 42.50 0.00 50.00 0.00 905.306
4 20.00 0.00 72.50 0.00 37.50 0.00 55.00 0.00 322.552
4 17.50 0.00 77.50 0.00 37.50 0.00 57.50 0.00 286.741
4 25.00 0.00 70.00 0.00 40.00 0.00 55.00 0.00 407.601
4 0.00 0.00 97.50 0.00 32.50 0.00 65.00 0.00 220.482
4 22.50 0.00 75.00 0.00 40.00 0.00 57.50 0.00 362.937
4 30.00 0.00 67.50 0.00 42.50 0.00 55.00 0.00 484.743
4 15.00 0.00 82.50 0.00 37.50 0.00 60.00 0.00 276.255
4 7.50 0.00 90.00 0.00 35.00 0.00 62.50 0.00 215.953
4 5.00 0.00 95.00 0.00 35.00 0.00 65.00 0.00 224.28
4 20.00 0.00 80.00 0.00 40.00 0.00 60.00 0.00 315.237
4 27.50 0.00 72.50 0.00 42.50 0.00 57.50 0.00 475.052
4 12.50 0.00 87.50 0.00 37.50 0.00 62.50 0.00 257.188
4 42.50 0.00 57.50 0.00 47.50 0.00 52.50 0.00 608.485
4 10.00 0.00 92.50 0.00 37.50 0.00 65.00 0.00 259.014
4 47.50 0.00 55.00 0.00 50.00 0.00 52.50 0.00 2178.5
4 25.00 0.00 77.50 0.00 42.50 0.00 60.00 0.00 349.724
4 17.50 0.00 85.00 0.00 40.00 0.00 62.50 0.00 317.084
4 15.00 0.00 90.00 0.00 40.00 0.00 65.00 0.00 272.183
4 7.50 0.00 97.50 0.00 37.50 0.00 67.50 0.00 239.245
4 37.50 0.00 67.50 0.00 47.50 0.00 57.50 0.00 554.101
4 22.50 0.00 82.50 0.00 42.50 0.00 62.50 0.00 303.825
4 20.00 0.00 87.50 0.00 42.50 0.00 65.00 0.00 302.434
4 42.50 0.00 65.00 0.00 50.00 0.00 57.50 0.00 615.465
4 12.50 0.00 95.00 0.00 40.00 0.00 67.50 0.00 267.49
4 50.00 0.00 57.50 0.00 52.50 0.00 55.00 0.00 2689.45
4 35.00 0.00 72.50 0.00 47.50 0.00 60.00 0.00 451.425
4 47.50 0.00 62.50 0.00 52.50 0.00 57.50 0.00 1020.75
4 17.50 0.00 92.50 0.00 42.50 0.00 67.50 0.00 293.183
4 10.00 0.00 100.00 0.00 40.00 0.00 70.00 0.00 -106.053
4 30.00 0.00 82.50 0.00 47.50 0.00 65.00 0.00 332.886
4 37.50 0.00 75.00 0.00 50.00 0.00 62.50 0.00 401.628
4 15.00 0.00 97.50 0.00 42.50 0.00 70.00 0.00 199.542
4 35.00 0.00 80.00 0.00 50.00 0.00 65.00 0.00 268.438
4 27.50 0.00 87.50 0.00 47.50 0.00 67.50 0.00 306.368
4 42.50 0.00 72.50 0.00 52.50 0.00 62.50 0.00 21.6915
4 25.00 0.00 92.50 0.00 47.50 0.00 70.00 0.00 250.302
4 55.00 0.00 62.50 0.00 57.50 0.00 60.00 0.00 2515.62
4 47.50 0.00 70.00 0.00 55.00 0.00 62.50 0.00 1208.84
4 22.50 0.00 97.50 0.00 47.50 0.00 72.50 0.00 237.512
4 30.00 0.00 90.00 0.00 50.00 0.00 70.00 0.00 264.305
4 27.50 0.00 95.00 0.00 50.00 0.00 72.50 0.00 230.848
4 57.50 0.00 65.00 0.00 60.00 0.00 62.50 0.00 2117.69
4 50.00 0.00 72.50 0.00 57.50 0.00 65.00 0.00 979.88
4 42.50 0.00 80.00 0.00 55.00 0.00 67.50 0.00 625.665
4 35.00 0.00 87.50 0.00 52.50 0.00 70.00 0.00 194.268
4 55.00 0.00 70.00 0.00 60.00 0.00 65.00 0.00 1340.85
4 47.50 0.00 77.50 0.00 57.50 0.00 67.50 0.00 813.245
4 25.00 0.00 100.00 0.00 50.00 0.00 75.00 0.00 218.956
4 37.50 0.00 90.00 0.00 55.00 0.00 72.50 0.00 431.647
4 30.00 0.00 97.50 0.00 52.50 0.00 75.00 0.00 644.573
4 60.00 0.00 67.50 0.00 62.50 0.00 65.00 0.00 2457.15
4 42.50 0.00 87.50 0.00 57.50 0.00 72.50 0.00 612.601
4 35.00 0.00 95.00 0.00 55.00 0.00 75.00 0.00 390.051
4 57.50 0.00 72.50 0.00 62.50 0.00 67.50 0.00 1572.53
4 47.50 0.00 85.00 0.00 60.00 0.00 72.50 0.00 688.554
4 62.50 0.00 70.00 0.00 65.00 0.00 67.50 0.00 2585.48
4 55.00 0.00 77.50 0.00 62.50 0.00 70.00 0.00 753.749
4 37.50 0.00 97.50 0.00 57.50 0.00 77.50 0.00 409.146
4 60.00 0.00 75.00 0.00 65.00 0.00 70.00 0.00 1191.19
4 65.00 0.00 72.50 0.00 67.50 0.00 70.00 0.00 2243.49
4 57.50 0.00 80.00 0.00 65.00 0.00 72.50 0.00 802.788
4 42.50 0.00 95.00 0.00 60.00 0.00 77.50 0.00 553.547
4 62.50 0.00 77.50 0.00 67.50 0.00 72.50 0.00 1041.29
4 55.00 0.00 85.00 0.00 65.00 0.00 75.00 0.00 720.502
4 47.50 0.00 92.50 0.00 62.50 0.00 77.50 0.00 580.815
4 67.50 0.00 75.00 0.00 70.00 0.00 72.50 0.00 2851.04
4 60.00 0.00 82.50 0.00 67.50 0.00 75.00 0.00 950.952
4 50.00 0.00 95.00 0.00 65.00 0.00 80.00 0.00 442.579
4 57.50 0.00 87.50 0.00 67.50 0.00 77.50 0.00 739.585
4 55.00 0.00 92.50 0.00 67.50 0.00 80.00 0.00 565.723
4 47.50 0.00 100.00 0.00 65.00 0.00 82.50 0.00 580.694
4 70.00 0.00 77.50 0.00 72.50 0.00 75.00 0.00 2069.96
4 62.50 0.00 85.00 0.00 70.00 0.00 77.50 0.00 891.111
4 60.00 0.00 90.00 0.00 70.00 0.00 80.00 0.00 1066.97
4 67.50 0.00 82.50 0.00 72.50 0.00 77.50 0.00 1625.49
4 72.50 0.00 80.00 0.00 75.00 0.00 77.50 0.00 -1423.73
4 57.50 0.00 95.00 0.00 70.00 0.00 82.50 0.00 995.739
4 62.50 0.00 92.50 0.00 72.50 0.00 82.50 0.00 1053.72
4 55.00 0.00 100.00 0.00 70.00 0.00 85.00 0.00 970.796
4 70.00 0.00 85.00 0.00 75.00 0.00 80.00 0.00 554.919
4 67.50 0.00 90.00 0.00 75.00 0.00 82.50 0.00 726.503
4 75.00 0.00 82.50 0.00 77.50 0.00 80.00 0.00 2265.58
4 60.00 0.00 97.50 0.00 72.50 0.00 85.00 0.00 935.624
4 72.50 0.00 87.50 0.00 77.50 0.00 82.50 0.00 1253.08
4 65.00 0.00 95.00 0.00 75.00 0.00 85.00 0.00 2249.75
4 77.50 0.00 85.00 0.00 80.00 0.00 82.50 0.00 2822.67
4 70.00 0.00 92.50 0.00 77.50 0.00 85.00 0.00 1174.31
4 62.50 0.00 100.00 0.00 75.00 0.00 87.50 0.00 1244.36
4 75.00 0.00 90.00 0.00 80.00 0.00 85.00 0.00 1408.57
4 67.50 0.00 97.50 0.00 77.50 0.00 87.50 0.00 1231.22
4 80.00 0.00 87.50 0.00 82.50 0.00 85.00 0.00 2438.65
4 72.50 0.00 95.00 0.00 80.00 0.00 87.50 0.00 1457.3
4 77.50 0.00 92.50 0.00 82.50 0.00 87.50 0.00 1727.85
4 70.00 0.00 100.00 0.00 80.00 0.00 90.00 0.00 1419.87
4 75.00 0.00 97.50 0.00 82.50 0.00 90.00 0.00 1702.62
4 82.50 0.00 90.00 0.00 85.00 0.00 87.50 0.00 3443.5
4 80.00 0.00 95.00 0.00 85.00 0.00 90.00 0.00 2194.1
4 85.00 0.00 92.50 0.00 87.50 0.00 90.00 0.00 2458.38
4 77.50 0.00 100.00 0.00 85.00 0.00 92.50 0.00 1904.15
4 82.50 0.00 97.50 0.00 87.50 0.00 92.50 0.00 2215.85
4 87.50 0.00 95.00 0.00 90.00 0.00 92.50 0.00 2843.39
4 85.00 0.00 100.00 0.00 90.00 0.00 95.00 0.00 2172.57
4 90.00 0.00 97.50 0.00 92.50 0.00 95.00 0.00 2662.16
4 92.50 0.00 100.00 0.00 95.00 0.00 97.50 0.00 2920.63
2
41
0.00	2779.33
2.50	2783.15
5.00	2786.70
7.50	2787.30
10.00	2791.50
12.50	2794.10
15.00	2796.10
17.50	2797.70
20.00	2799.00
22.50	2800.00
25.00	2801.80
27.50	2803.90
30.00	2805.03
32.50	2807.00
35.00	2807.88
37.50	2809.45
40.00	2811.55
42.50	2812.40
45.00	2813.73
47.50	2815.25
50.00	2817.33
52.50	2816.50
55.00	2814.65
57.50	2812.35
60.00	2809.30
62.50	2805.30
65.00	2803.00
67.50	2799.85
70.00	2799.00
72.50	2796.10
75.00	2792.88
77.50	2789.25
80.00	2787.63
82.50	2784.40
85.00	2780.10
87.50	2776.95
90.00	2775.25
92.50	2773.70
95.00	2772.73
97.5	2771.50
100.00	2771.38
0
0
0
0
0
0
