# Supplementary material for: A temperature-dependent mechanical model to assess the stability of degrading permafrost rock slopes
Source: Copernicus journal article supplement (doi:10.5194/esurf-9-1125-2021), 2021-09-09
Supplement: Supplementary file 3 [file esurf-9-1125-2021-supplement.zip › Dataset S3. ERT_Fig. 4b/Wen32mx_1-2013-10-02-090722.txt]

Filename:                   /media/sda1/Wen32mx_1-2013-10-02-090722.txt
Instrument serial number:   LS211110124

Instrument SW version:      1.10.10(1897)
Date and time:              2013-10-02 09:07:30
Project name:               Project12
Task name:                  Wen32mx_1
Spread file:                /home/root/protocols/2X21S.xml
Protocol file:              /home/root/protocols/Wen32mx.xml
Base station:               0.000,0.000,0.000
Sub array code:             1
Measurement mode:           resistance dV resistance apparent resistivity SP
Has IP measurements:        no
Smallest electrode spacing: 2.50

Acquirement settings in use from time 2013-09-20 09:21:10:
  - AGC_TimeSec: 0.060000
  - Acq_DelaySec: 0.100000
  - Acq_TimeSec: 0.200000
  - AutoStack: 1
  - BaseFreqHz: 50.000000
  - CurrentLimitHighAmpere: 0.050000
  - CurrentLimitLowAmpere: 0.001000
  - DoInitialAGC: 0
  - ElectrodeResistanceBadLimitHighOhm: 300000.000000
  - ElectrodeResistanceBadLimitLowOhm: 200000.000000
  - ElectrodeTest: 1
  - ElectrodeTestCurrentAmpere: 0.005000
  - ErrorLimit: 0.010000
  - Fullwaveform: 0
  - IPSP_TimeSec: 0.500000
  - IP_MinOffTimeSec: 0.500000
  - IP_OffTimeSec: 0.400000
  - IP_WindowSecList: 0.01 0.02 0.02
  - MarginLimitHigh: 1.010000
  - MeasureMode: 2
  - Measure_SNR: 0
  - PowerLimitHighWatt: 20.000000
  - PowerLimitLowWatt: 0.000000
  - PowerLossLimitHighWatt: 25.000000
  - SNR_TimeSec: 0.020000
  - SP_TimeSec: 1.000000
  - SampleRateHz: 1000.000000
  - StackLimitsHigh: 4
  - StackLimitsLow: 2
  - StackNorm: 0
  - VoltageLimitHighVolt: 500.000000
  - VoltageLimitLowVolt: 0.000000

Acquirement settings in use from time 2013-09-20 09:22:57:
  - AGC_TimeSec: 0.060000
  - Acq_DelaySec: 0.100000
  - Acq_TimeSec: 0.200000
  - AutoStack: 1
  - BaseFreqHz: 50.000000
  - CurrentLimitHighAmpere: 0.050000
  - CurrentLimitLowAmpere: 0.001000
  - DoInitialAGC: 0
  - ElectrodeResistanceBadLimitHighOhm: 300000.000000
  - ElectrodeResistanceBadLimitLowOhm: 200000.000000
  - ElectrodeTest: 1
  - ElectrodeTestCurrentAmpere: 0.005000
  - ErrorLimit: 0.010000
  - Fullwaveform: 0
  - IPSP_TimeSec: 0.500000
  - IP_MinOffTimeSec: 0.500000
  - IP_OffTimeSec: 0.400000
  - IP_WindowSecList: 0.01 0.02 0.02
  - MarginLimitHigh: 1.010000
  - MeasureMode: 2
  - Measure_SNR: 0
  - PowerLimitHighWatt: 20.000000
  - PowerLimitLowWatt: 0.000000
  - PowerLossLimitHighWatt: 25.000000
  - SNR_TimeSec: 0.020000
  - SP_TimeSec: 1.000000
  - SampleRateHz: 1000.000000
  - StackLimitsHigh: 4
  - StackLimitsLow: 2
  - StackNorm: 0
  - VoltageLimitHighVolt: 500.000000
  - VoltageLimitLowVolt: 0.000000

Acquirement settings in use from time 2013-09-20 09:24:17:
  - AGC_TimeSec: 0.060000
  - Acq_DelaySec: 0.100000
  - Acq_TimeSec: 0.200000
  - AutoStack: 1
  - BaseFreqHz: 50.000000
  - CurrentLimitHighAmpere: 0.050000
  - CurrentLimitLowAmpere: 0.001000
  - DoInitialAGC: 0
  - ElectrodeResistanceBadLimitHighOhm: 300000.000000
  - ElectrodeResistanceBadLimitLowOhm: 200000.000000
  - ElectrodeTest: 1
  - ElectrodeTestCurrentAmpere: 0.005000
  - ErrorLimit: 0.010000
  - Fullwaveform: 0
  - IPSP_TimeSec: 0.500000
  - IP_MinOffTimeSec: 0.500000
  - IP_OffTimeSec: 0.400000
  - IP_WindowSecList: 0.01 0.02 0.02
  - MarginLimitHigh: 1.010000
  - MeasureMode: 2
  - Measure_SNR: 0
  - PowerLimitHighWatt: 20.000000
  - PowerLimitLowWatt: 0.000000
  - PowerLossLimitHighWatt: 25.000000
  - SNR_TimeSec: 0.020000
  - SP_TimeSec: 1.000000
  - SampleRateHz: 1000.000000
  - StackLimitsHigh: 4
  - StackLimitsLow: 2
  - StackNorm: 0
  - VoltageLimitHighVolt: 500.000000
  - VoltageLimitLowVolt: 0.000000

Acquirement settings in use from time 2013-09-20 09:25:37:
  - AGC_TimeSec: 0.060000
  - Acq_DelaySec: 0.100000
  - Acq_TimeSec: 0.200000
  - AutoStack: 1
  - BaseFreqHz: 50.000000
  - CurrentLimitHighAmpere: 0.050000
  - CurrentLimitLowAmpere: 0.001000
  - DoInitialAGC: 0
  - ElectrodeResistanceBadLimitHighOhm: 300000.000000
  - ElectrodeResistanceBadLimitLowOhm: 200000.000000
  - ElectrodeTest: 1
  - ElectrodeTestCurrentAmpere: 0.005000
  - ErrorLimit: 0.010000
  - Fullwaveform: 0
  - IPSP_TimeSec: 0.500000
  - IP_MinOffTimeSec: 0.500000
  - IP_OffTimeSec: 0.400000
  - IP_WindowSecList: 0.01 0.02 0.02
  - MarginLimitHigh: 1.010000
  - MeasureMode: 2
  - Measure_SNR: 0
  - PowerLimitHighWatt: 20.000000
  - PowerLimitLowWatt: 0.000000
  - PowerLossLimitHighWatt: 25.000000
  - SNR_TimeSec: 0.020000
  - SP_TimeSec: 1.000000
  - SampleRateHz: 1000.000000
  - StackLimitsHigh: 4
  - StackLimitsLow: 2
  - StackNorm: 0
  - VoltageLimitHighVolt: 500.000000
  - VoltageLimitLowVolt: 0.000000

Acquirement settings in use from time 2013-09-20 09:26:39:
  - AGC_TimeSec: 0.060000
  - Acq_DelaySec: 0.100000
  - Acq_TimeSec: 0.200000
  - AutoStack: 1
  - BaseFreqHz: 50.000000
  - CurrentLimitHighAmpere: 0.050000
  - CurrentLimitLowAmpere: 0.001000
  - DoInitialAGC: 0
  - ElectrodeResistanceBadLimitHighOhm: 300000.000000
  - ElectrodeResistanceBadLimitLowOhm: 200000.000000
  - ElectrodeTest: 1
  - ElectrodeTestCurrentAmpere: 0.005000
  - ErrorLimit: 0.010000
  - Fullwaveform: 0
  - IPSP_TimeSec: 0.500000
  - IP_MinOffTimeSec: 0.500000
  - IP_OffTimeSec: 0.400000
  - IP_WindowSecList: 0.01 0.02 0.02
  - MarginLimitHigh: 1.010000
  - MeasureMode: 2
  - Measure_SNR: 0
  - PowerLimitHighWatt: 20.000000
  - PowerLimitLowWatt: 0.000000
  - PowerLossLimitHighWatt: 25.000000
  - SNR_TimeSec: 0.020000
  - SP_TimeSec: 1.000000
  - SampleRateHz: 1000.000000
  - StackLimitsHigh: 4
  - StackLimitsLow: 2
  - StackNorm: 0
  - VoltageLimitHighVolt: 500.000000
  - VoltageLimitLowVolt: 0.000000

N	Time             	MeasID	Seq#	DPID	Channel	A(x)	A(y)	A(z)	B(x)	B(y)	B(z)	M(x)	M(y)	M(z)	N(x)	N(y)	N(z)	F(x)	F(y)	F(z)	Note   	I(mA)	Vout(V)	Voltage(V)	SP(V)	R(Ohm)	Var(%)	App.R(Ohmm)	Cycles	Ready?	Pint(V)	Pext(V)	Temp(C)	Latitude	Longitude	Pos.Quality	
1	2013-09-20 09:40:45	196	0	88	1	5.0	0.0	0.0	12.5	0.0	0.0	7.5	0.0	0.0	10.0	0.0	0.0	8.8	0.0	1.3	-	0.923877	374.491	1.7744	0	1920.6	14.8	30168.7	4	1	0.0	12.5	24.9	47.420090	10.982963	          3	
2	2013-09-20 09:38:30	164	0	51	1	2.5	0.0	0.0	17.5	0.0	0.0	7.5	0.0	0.0	12.5	0.0	0.0	10.0	0.0	2.6	-	1.10021	380.699	0.817916	0	743.419	3.3	23355.2	4	1	0.0	12.5	24.8	47.419933	10.982915	          3	
3	2013-09-20 09:36:32	135	0	22	1	0.0	0.0	0.0	22.5	0.0	0.0	7.5	0.0	0.0	15.0	0.0	0.0	11.2	0.0	3.9	-	1.13227	376.191	0.70086	0	618.99	0.2	29169.2	2	1	0.0	12.5	24.5	47.420015	10.982935	          3	
4	2013-09-20 09:40:52	197	0	224	1	7.5	0.0	0.0	15.0	0.0	0.0	10.0	0.0	0.0	12.5	0.0	0.0	11.2	0.0	1.3	-	1.13182	305.809	1.95717	0	1729.22	0.2	27162.6	2	1	0.0	12.5	24.8	47.420103	10.982963	          3	
5	2013-09-20 09:38:37	165	0	189	1	5.0	0.0	0.0	20.0	0.0	0.0	10.0	0.0	0.0	15.0	0.0	0.0	12.5	0.0	2.6	-	1.01988	374.855	0.638008	0	625.569	0.1	19652.8	2	1	0.0	12.5	24.5	47.419933	10.982910	          3	
6	2013-09-20 09:36:38	136	0	138	1	2.5	0.0	0.0	25.0	0.0	0.0	10.0	0.0	0.0	17.5	0.0	0.0	13.8	0.0	3.9	-	1.2597	375.462	0.652387	0	517.89	0.2	24405	2	1	0.0	12.5	24.7	47.420017	10.982933	          3	
7	2013-09-20 09:38:42	166	0	70	1	7.5	0.0	0.0	22.5	0.0	0.0	12.5	0.0	0.0	17.5	0.0	0.0	15.0	0.0	2.6	-	2.78023	438.574	1.84158	0	662.385	0.1	20809.4	2	1	0.0	12.5	24.8	47.419940	10.982912	          3	
8	2013-09-20 09:36:43	137	0	196	1	5.0	0.0	0.0	27.5	0.0	0.0	12.5	0.0	0.0	20.0	0.0	0.0	16.2	0.0	3.9	-	0.934578	377.413	0.62426	0	667.959	0.1	31476.8	2	1	0.0	12.5	24.7	47.420013	10.982935	          3	
9	2013-09-20 09:40:59	199	0	231	1	12.5	0.0	0.0	20.0	0.0	0.0	15.0	0.0	0.0	17.5	0.0	0.0	16.2	0.0	1.3	-	1.03786	375.108	1.92741	0	1857.1	0.1	29171.3	2	1	0.0	12.5	25.0	47.420107	10.982960	          3	
10	2013-09-20 09:41:04	200	0	121	1	15.0	0.0	0.0	22.5	0.0	0.0	17.5	0.0	0.0	20.0	0.0	0.0	18.8	0.0	1.3	-	2.6909	443.014	8.41759	0	3128.17	0.0	49137.1	2	1	0.0	12.5	24.9	47.420112	10.982965	          3	
11	2013-09-20 09:36:48	138	0	241	1	7.5	0.0	0.0	30.0	0.0	0.0	15.0	0.0	0.0	22.5	0.0	0.0	18.8	0.0	3.9	-	0.997299	370.863	0.594758	0	596.368	0.3	28103.2	2	1	0.0	12.5	24.7	47.420002	10.982935	          3	
12	2013-09-20 09:34:52	112	0	59	1	5.0	0.0	0.0	35.0	0.0	0.0	15.0	0.0	0.0	25.0	0.0	0.0	20.0	0.0	5.2	-	1.58809	386.826	0.902161	0	568.08	0.0	35693.5	2	1	0.0	12.5	24.7	47.420095	10.982983	          3	
13	2013-09-20 09:38:49	168	0	249	1	12.5	0.0	0.0	27.5	0.0	0.0	17.5	0.0	0.0	22.5	0.0	0.0	20.0	0.0	2.6	-	0.941023	379.965	0.857753	0	911.51	0.2	28635.9	2	1	0.0	12.5	24.7	47.419938	10.982917	          3	
14	2013-09-20 09:41:08	201	0	3	1	17.5	0.0	0.0	25.0	0.0	0.0	20.0	0.0	0.0	22.5	0.0	0.0	21.2	0.0	1.3	-	1.05631	371.483	0.942925	0	892.659	0.1	14021.9	2	1	0.0	12.5	24.9	47.420110	10.982967	          3	
15	2013-09-20 09:38:54	169	0	161	1	15.0	0.0	0.0	30.0	0.0	0.0	20.0	0.0	0.0	25.0	0.0	0.0	22.5	0.0	2.6	-	0.996803	378.265	0.908507	0	911.421	0.1	28633.1	2	1	0.0	12.5	24.8	47.419948	10.982923	          3	
16	2013-09-20 09:36:54	140	0	48	1	12.5	0.0	0.0	35.0	0.0	0.0	20.0	0.0	0.0	27.5	0.0	0.0	23.8	0.0	3.9	-	1.49322	358.186	0.849231	0	568.726	0.2	26800.6	2	1	0.0	12.5	24.7	47.419975	10.982928	          3	
17	2013-09-20 09:33:25	90	0	139	1	5.0	0.0	0.0	42.5	0.0	0.0	17.5	0.0	0.0	30.0	0.0	0.0	23.8	0.0	6.5	-	1.30227	401.632	0.758273	0	582.269	0.1	45731.3	2	1	0.0	12.5	24.7	47.420067	10.982968	          3	
18	2013-09-20 09:41:13	202	0	218	1	20.0	0.0	0.0	27.5	0.0	0.0	22.5	0.0	0.0	25.0	0.0	0.0	23.8	0.0	1.3	-	1.06771	391.086	1.88578	0	1766.19	0.1	27743.2	2	1	0.0	12.5	25.0	47.420103	10.982968	          3	
19	2013-09-20 09:32:03	69	0	14	1	2.5	0.0	0.0	47.5	0.0	0.0	17.5	0.0	0.0	32.5	0.0	0.0	25.0	0.0	7.8	-	1.35854	390.378	0.474455	0	349.24	0.1	32915.1	2	1	0.0	12.5	24.7	47.420112	10.982948	          3	
20	2013-09-20 09:41:18	203	0	143	1	22.5	0.0	0.0	30.0	0.0	0.0	25.0	0.0	0.0	27.5	0.0	0.0	26.2	0.0	1.3	-	1.46967	400.791	1.91566	0	1303.46	0.2	20474.8	2	1	0.0	12.5	25.0	47.420097	10.982968	          3	
21	2013-09-20 09:35:01	115	0	118	1	12.5	0.0	0.0	42.5	0.0	0.0	22.5	0.0	0.0	32.5	0.0	0.0	27.5	0.0	5.2	-	1.30533	399.295	0.891422	0	682.907	0.1	42908.3	2	1	0.0	12.5	24.5	47.420088	10.982982	          3	
22	2013-09-20 09:39:02	171	0	227	1	20.0	0.0	0.0	35.0	0.0	0.0	25.0	0.0	0.0	30.0	0.0	0.0	27.5	0.0	2.6	-	1.9183	392.755	1.65799	0	864.302	0.0	27152.8	2	1	0.0	12.5	24.8	47.419940	10.982925	          3	
23	2013-09-20 09:30:54	53	0	126	1	2.5	0.0	0.0	55.0	0.0	0.0	20.0	0.0	0.0	37.5	0.0	0.0	28.8	0.0	9.1	-	1.04487	380.527	0.350607	0	335.55	0.2	36895.6	2	1	0.0	12.5	24.8	47.420082	10.982978	          3	
24	2013-09-20 09:39:07	172	0	74	1	22.5	0.0	0.0	37.5	0.0	0.0	27.5	0.0	0.0	32.5	0.0	0.0	30.0	0.0	2.6	-	1.20935	406.55	1.32123	0	1092.51	0.2	34322.3	2	1	0.0	12.5	24.8	47.419930	10.982927	          3	
25	2013-09-20 09:31:00	54	0	49	1	5.0	0.0	0.0	57.5	0.0	0.0	22.5	0.0	0.0	40.0	0.0	0.0	31.2	0.0	9.1	-	1.15194	390.866	0.42477	0	368.743	0.2	40545.4	2	1	0.0	12.5	24.8	47.420068	10.982993	          3	
26	2013-09-20 09:41:25	205	0	134	1	27.5	0.0	0.0	35.0	0.0	0.0	30.0	0.0	0.0	32.5	0.0	0.0	31.2	0.0	1.3	-	1.53976	371.612	2.44128	0	1585.49	0.2	24904.9	2	1	0.0	12.5	24.9	47.420098	10.982968	          3	
27	2013-09-20 09:37:03	143	0	156	1	20.0	0.0	0.0	42.5	0.0	0.0	27.5	0.0	0.0	35.0	0.0	0.0	31.2	0.0	3.9	-	1.53745	415.793	1.41373	0	919.531	0.2	43331.9	2	1	0.0	12.5	24.7	47.419965	10.982923	          3	
28	2013-09-20 09:29:48	38	0	185	1	2.5	0.0	0.0	62.5	0.0	0.0	22.5	0.0	0.0	42.5	0.0	0.0	32.5	0.0	10.4	-	1.20212	387.851	0.427892	0	355.947	0.3	44729.6	2	1	0.0	12.5	25.0	47.420140	10.982960	          3	
29	2013-09-20 09:35:06	116	0	242	1	17.5	0.0	0.0	47.5	0.0	0.0	27.5	0.0	0.0	37.5	0.0	0.0	32.5	0.0	5.2	-	1.13383	387.617	0.605163	0	533.733	0.1	33535.4	2	1	0.0	12.5	24.7	47.420088	10.982978	          3	
30	2013-09-20 09:33:33	93	0	2	1	15.0	0.0	0.0	52.5	0.0	0.0	27.5	0.0	0.0	40.0	0.0	0.0	33.8	0.0	6.5	-	0.971561	315.044	0.302979	0	311.848	0.1	24492.5	2	1	0.0	12.5	24.5	47.420080	10.982960	          3	
31	2013-09-20 09:31:04	55	0	89	1	7.5	0.0	0.0	60.0	0.0	0.0	25.0	0.0	0.0	42.5	0.0	0.0	33.8	0.0	9.1	-	0.956087	356.249	0.377282	0	394.61	0.3	43389.6	2	1	0.0	12.5	24.8	47.420098	10.982983	          3	
32	2013-09-20 09:35:11	117	0	12	1	20.0	0.0	0.0	50.0	0.0	0.0	30.0	0.0	0.0	40.0	0.0	0.0	35.0	0.0	5.2	-	0.950187	387.073	0.450945	0	474.586	0.2	29819.1	2	1	0.0	12.5	24.5	47.420093	10.982980	          3	
33	2013-09-20 09:39:14	174	0	56	1	27.5	0.0	0.0	42.5	0.0	0.0	32.5	0.0	0.0	37.5	0.0	0.0	35.0	0.0	2.6	-	1.14279	352.488	1.64694	0	1441.16	0.0	45275.3	2	1	0.0	12.5	24.8	47.419940	10.982930	          3	
34	2013-09-20 09:32:14	73	0	93	1	12.5	0.0	0.0	57.5	0.0	0.0	27.5	0.0	0.0	42.5	0.0	0.0	35.0	0.0	7.8	-	1.14768	386.795	0.530251	0	462.021	0.3	43544.4	2	1	0.0	12.5	24.7	47.420120	10.982952	          3	
35	2013-09-20 09:37:08	144	0	142	1	25.0	0.0	0.0	47.5	0.0	0.0	32.5	0.0	0.0	40.0	0.0	0.0	36.2	0.0	3.9	-	1.35718	399.851	1.0654	0	785.011	0.0	36992.8	2	1	0.0	12.5	24.5	47.420010	10.982917	          3	
36	2013-09-20 09:29:53	39	0	16	1	7.5	0.0	0.0	67.5	0.0	0.0	27.5	0.0	0.0	47.5	0.0	0.0	37.5	0.0	10.4	-	1.70082	400.826	0.504046	0	296.355	0.1	37241.1	2	1	0.0	12.5	25.0	47.420128	10.982947	          3	
37	2013-09-20 09:35:16	118	0	106	1	22.5	0.0	0.0	52.5	0.0	0.0	32.5	0.0	0.0	42.5	0.0	0.0	37.5	0.0	5.2	-	1.0355	245.655	0.356293	0	344.079	0.4	21619.1	2	1	0.0	12.5	24.5	47.420087	10.982980	          3	
38	2013-09-20 09:27:58	15	0	236	1	0.0	0.0	0.0	75.0	0.0	0.0	25.0	0.0	0.0	50.0	0.0	0.0	37.5	0.0	13.0	-	1.01283	383.829	0.211936	0	209.252	0.3	32869.2	2	1	0.0	12.5	25.8	47.420043	10.983040	          3	
39	2013-09-20 09:28:48	26	0	54	1	5.0	0.0	0.0	72.5	0.0	0.0	27.5	0.0	0.0	50.0	0.0	0.0	38.8	0.0	11.7	-	1.09057	387.447	0.279639	0	256.416	0.3	36250	2	1	0.0	12.5	25.3	47.420075	10.982973	          3	
40	2013-09-20 09:41:35	208	0	153	1	35.0	0.0	0.0	42.5	0.0	0.0	37.5	0.0	0.0	40.0	0.0	0.0	38.8	0.0	1.3	-	3.06175	448.55	5.63085	0	1839.1	0.1	28888.5	2	1	0.0	12.5	25.0	47.420092	10.982967	          3	
41	2013-09-20 09:32:19	74	0	29	1	17.5	0.0	0.0	62.5	0.0	0.0	32.5	0.0	0.0	47.5	0.0	0.0	40.0	0.0	7.8	-	1.02864	384.433	0.424361	0	412.544	0.1	38881.4	2	1	0.0	12.5	24.5	47.420125	10.982952	          3	
42	2013-09-20 09:28:04	16	0	81	1	2.5	0.0	0.0	77.5	0.0	0.0	27.5	0.0	0.0	52.5	0.0	0.0	40.0	0.0	13.0	-	1.32423	375.26	1.27795	0	965.045	11.9	151589	4	1	0.0	12.5	25.8	47.420042	10.983043	          3	
43	2013-09-20 09:33:41	95	0	37	1	22.5	0.0	0.0	60.0	0.0	0.0	35.0	0.0	0.0	47.5	0.0	0.0	41.2	0.0	6.5	-	1.48537	410.356	0.665117	0	447.779	3.2	35168.5	2	1	0.0	12.5	24.7	47.420097	10.982947	          3	
44	2013-09-20 09:31:11	57	0	69	1	15.0	0.0	0.0	67.5	0.0	0.0	32.5	0.0	0.0	50.0	0.0	0.0	41.2	0.0	9.1	-	1.67332	410.31	0.398082	0	237.9	0.0	26158.4	2	1	0.0	12.5	24.8	47.420120	10.982968	          3	
45	2013-09-20 09:28:54	27	0	85	1	7.5	0.0	0.0	75.0	0.0	0.0	30.0	0.0	0.0	52.5	0.0	0.0	41.2	0.0	11.7	-	1.96013	404.501	0.540345	0	275.667	29.9	38971.6	4	1	0.0	12.5	25.4	47.420092	10.982968	          3	
46	2013-09-20 09:32:24	75	0	75	1	20.0	0.0	0.0	65.0	0.0	0.0	35.0	0.0	0.0	50.0	0.0	0.0	42.5	0.0	7.8	-	0.934724	382.895	0.234632	0	251.017	0.8	23657.8	2	1	0.0	12.5	24.5	47.420112	10.982955	          3	
47	2013-09-20 09:35:21	119	0	90	1	27.5	0.0	0.0	57.5	0.0	0.0	37.5	0.0	0.0	47.5	0.0	0.0	42.5	0.0	5.2	-	1.1234	382.49	0.931814	0	829.462	0.0	52116.6	2	1	0.0	12.5	24.5	47.420065	10.982987	          3	
48	2013-09-20 09:30:00	41	0	150	1	12.5	0.0	0.0	72.5	0.0	0.0	32.5	0.0	0.0	52.5	0.0	0.0	42.5	0.0	10.4	-	1.09723	387.676	0.135882	0	123.841	119.2	15562.3	4	1	0.0	12.5	25.0	47.420138	10.982933	          3	
49	2013-09-20 09:28:10	17	0	169	1	5.0	0.0	0.0	80.0	0.0	0.0	30.0	0.0	0.0	55.0	0.0	0.0	42.5	0.0	13.0	-	0.937434	383.848	0.264443	0	282.092	0.2	44311	2	1	0.0	12.5	25.7	47.420048	10.983030	          3	
50	2013-09-20 09:33:46	96	0	140	1	25.0	0.0	0.0	62.5	0.0	0.0	37.5	0.0	0.0	50.0	0.0	0.0	43.8	0.0	6.5	-	1.19511	393.305	0.496391	0	415.351	0.4	32621.6	2	1	0.0	12.5	24.5	47.420077	10.982953	          3	
51	2013-09-20 09:29:00	28	0	174	1	10.0	0.0	0.0	77.5	0.0	0.0	32.5	0.0	0.0	55.0	0.0	0.0	43.8	0.0	11.7	-	0.951235	318.664	0.247184	0	259.856	0.4	36736.3	2	1	0.0	12.5	25.4	47.420085	10.982975	          3	
52	2013-09-20 09:27:27	9	0	255	1	2.5	0.0	0.0	85.0	0.0	0.0	30.0	0.0	0.0	57.5	0.0	0.0	43.8	0.0	14.3	-	1.43805	401.626	0.34304	0	238.544	0.5	41217.5	2	1	0.0	12.5	26.3	47.420072	10.983005	          3	
53	2013-09-20 09:28:15	18	0	9	1	7.5	0.0	0.0	82.5	0.0	0.0	32.5	0.0	0.0	57.5	0.0	0.0	45.0	0.0	13.0	-	1.33364	388.29	0.351628	0	263.661	0.1	41415.8	2	1	0.0	12.5	25.7	47.420063	10.983015	          3	
54	2013-09-20 09:26:56	3	0	91	1	0.0	0.0	0.0	90.0	0.0	0.0	30.0	0.0	0.0	60.0	0.0	0.0	45.0	0.0	15.6	-	1.13796	374.882	0.22783	0	200.208	0.0	37738.4	2	1	0.0	12.6	26.9	47.420082	10.982995	          3	
55	2013-09-20 09:32:29	76	0	170	1	22.5	0.0	0.0	67.5	0.0	0.0	37.5	0.0	0.0	52.5	0.0	0.0	45.0	0.0	7.8	-	3.0826	447.245	1.89656	0	615.246	11.2	57985.6	4	1	0.0	12.5	24.7	47.420112	10.982962	          3	
56	2013-09-20 09:30:07	42	0	182	1	15.0	0.0	0.0	75.0	0.0	0.0	35.0	0.0	0.0	55.0	0.0	0.0	45.0	0.0	10.4	-	1.91024	412.369	0.496045	0	259.677	0.5	32632	2	1	0.0	12.5	25.0	47.420118	10.982953	          3	
57	2013-09-20 09:29:05	29	0	18	1	12.5	0.0	0.0	80.0	0.0	0.0	35.0	0.0	0.0	57.5	0.0	0.0	46.2	0.0	11.7	-	0.935482	381.52	0.226931	0	242.582	1.9	34294.2	4	1	0.0	12.5	25.3	47.420065	10.982983	          3	
58	2013-09-20 09:27:33	10	0	96	1	5.0	0.0	0.0	87.5	0.0	0.0	32.5	0.0	0.0	60.0	0.0	0.0	46.2	0.0	14.3	-	0.932311	375.111	0.247411	0	265.374	0.1	45853.3	2	1	0.0	12.5	26.2	47.420065	10.983012	          3	
59	2013-09-20 09:37:18	147	0	147	1	35.0	0.0	0.0	57.5	0.0	0.0	42.5	0.0	0.0	50.0	0.0	0.0	46.2	0.0	3.9	-	2.43894	441.305	2.20798	0	905.306	0.1	42661.5	2	1	0.0	12.5	24.7	47.420053	10.982927	          3	
60	2013-09-20 09:31:18	59	0	256	1	20.0	0.0	0.0	72.5	0.0	0.0	37.5	0.0	0.0	55.0	0.0	0.0	46.2	0.0	9.1	-	1.25861	403.336	0.405965	0	322.552	0.1	35466.4	2	1	0.0	12.5	24.8	47.420083	10.982972	          3	
61	2013-09-20 09:30:12	43	0	26	1	17.5	0.0	0.0	77.5	0.0	0.0	37.5	0.0	0.0	57.5	0.0	0.0	47.5	0.0	10.4	-	1.17929	391.196	0.338152	0	286.741	0.1	36033	2	1	0.0	12.5	24.7	47.420112	10.982957	          3	
62	2013-09-20 09:32:35	77	0	57	1	25.0	0.0	0.0	70.0	0.0	0.0	40.0	0.0	0.0	55.0	0.0	0.0	47.5	0.0	7.8	-	0.960691	329.165	0.391578	0	407.601	0.2	38415.5	2	1	0.0	12.5	24.7	47.420078	10.982975	          3	
63	2013-09-20 09:26:41	1	0	5	1	0.0	0.0	0.0	97.5	0.0	0.0	32.5	0.0	0.0	65.0	0.0	0.0	48.8	0.0	16.9	-	1.01966	368.819	0.224817	0	220.482	0.1	45023.3	2	1	0.0	12.6	27.1	47.420087	10.982998	          3	
64	2013-09-20 09:31:23	60	0	33	1	22.5	0.0	0.0	75.0	0.0	0.0	40.0	0.0	0.0	57.5	0.0	0.0	48.8	0.0	9.1	-	3.88015	448.35	1.40825	0	362.937	0.1	39907	2	1	0.0	12.5	24.8	47.420075	10.982967	          3	
65	2013-09-20 09:33:53	98	0	65	1	30.0	0.0	0.0	67.5	0.0	0.0	42.5	0.0	0.0	55.0	0.0	0.0	48.8	0.0	6.5	-	1.11027	389.676	0.538197	0	484.743	0.1	38071.6	2	1	0.0	12.5	24.7	47.420085	10.982952	          3	
66	2013-09-20 09:29:12	30	0	112	1	15.0	0.0	0.0	82.5	0.0	0.0	37.5	0.0	0.0	60.0	0.0	0.0	48.8	0.0	11.7	-	1.29898	389.917	0.35885	0	276.255	0.1	39054.7	2	1	0.0	12.5	25.3	47.420055	10.982995	          3	
67	2013-09-20 09:27:38	11	0	192	1	7.5	0.0	0.0	90.0	0.0	0.0	35.0	0.0	0.0	62.5	0.0	0.0	48.8	0.0	14.3	-	2.80201	444.239	0.605103	0	215.953	0.1	37314	2	1	0.0	12.5	26.1	47.420060	10.983013	          3	
68	2013-09-20 09:27:04	5	0	28	1	5.0	0.0	0.0	95.0	0.0	0.0	35.0	0.0	0.0	65.0	0.0	0.0	50.0	0.0	15.6	-	1.60605	389.503	0.360206	0	224.28	0.1	42275.8	2	1	0.0	12.5	26.7	47.420080	10.983003	          3	
69	2013-09-20 09:30:17	44	0	120	1	20.0	0.0	0.0	80.0	0.0	0.0	40.0	0.0	0.0	60.0	0.0	0.0	50.0	0.0	10.4	-	1.05716	394.591	0.333257	0	315.237	0.1	39613.8	2	1	0.0	12.5	25.0	47.420107	10.982962	          3	
70	2013-09-20 09:32:41	78	0	157	1	27.5	0.0	0.0	72.5	0.0	0.0	42.5	0.0	0.0	57.5	0.0	0.0	50.0	0.0	7.8	-	1.06933	383.239	0.507985	0	475.052	0.1	44772.6	2	1	0.0	12.5	24.7	47.420078	10.982978	          3	
71	2013-09-20 09:28:23	20	0	198	1	12.5	0.0	0.0	87.5	0.0	0.0	37.5	0.0	0.0	62.5	0.0	0.0	50.0	0.0	13.0	-	0.936562	374.874	0.240872	0	257.188	0.1	40399	2	1	0.0	12.5	25.6	47.420075	10.983003	          3	
72	2013-09-20 09:39:23	177	0	245	1	42.5	0.0	0.0	57.5	0.0	0.0	47.5	0.0	0.0	52.5	0.0	0.0	50.0	0.0	2.6	-	1.66248	408.361	1.01159	0	608.485	15.1	19116.1	4	1	0.0	12.5	24.8	47.419937	10.982925	          3	
73	2013-09-20 09:27:43	12	0	34	1	10.0	0.0	0.0	92.5	0.0	0.0	37.5	0.0	0.0	65.0	0.0	0.0	51.2	0.0	14.3	-	1.00922	243.259	0.261401	0	259.014	0.9	44754.4	2	1	0.0	12.5	26.0	47.420058	10.983008	          3	
74	2013-09-20 09:41:39	209	0	152	1	47.5	0.0	0.0	55.0	0.0	0.0	50.0	0.0	0.0	52.5	0.0	0.0	51.2	0.0	1.3	-	1.00203	362.217	2.18292	0	2178.5	46.6	34219.8	4	1	0.0	12.5	24.8	47.420093	10.982970	          3	
75	2013-09-20 09:31:28	61	0	183	1	25.0	0.0	0.0	77.5	0.0	0.0	42.5	0.0	0.0	60.0	0.0	0.0	51.2	0.0	9.1	-	1.40901	405.941	0.492765	0	349.724	0.2	38454.2	2	1	0.0	12.5	24.8	47.420082	10.982965	          3	
76	2013-09-20 09:29:17	31	0	205	1	17.5	0.0	0.0	85.0	0.0	0.0	40.0	0.0	0.0	62.5	0.0	0.0	51.2	0.0	11.7	-	1.22289	392.981	0.387757	0	317.084	0.2	44826.7	2	1	0.0	12.5	25.3	47.420055	10.983000	          3	
77	2013-09-20 09:28:28	21	0	39	1	15.0	0.0	0.0	90.0	0.0	0.0	40.0	0.0	0.0	65.0	0.0	0.0	52.5	0.0	13.0	-	2.67565	445.293	0.728265	0	272.183	0.1	42754.4	2	1	0.0	12.5	25.6	47.420088	10.982988	          3	
78	2013-09-20 09:27:09	6	0	123	1	7.5	0.0	0.0	97.5	0.0	0.0	37.5	0.0	0.0	67.5	0.0	0.0	52.5	0.0	15.6	-	2.25902	431.515	0.54046	0	239.245	0.0	45096.7	2	1	0.0	12.5	26.7	47.420085	10.982993	          3	
79	2013-09-20 09:35:31	122	0	168	1	37.5	0.0	0.0	67.5	0.0	0.0	47.5	0.0	0.0	57.5	0.0	0.0	52.5	0.0	5.2	-	0.939704	386.702	0.520691	0	554.101	0.0	34815.2	2	1	0.0	12.5	24.7	47.420032	10.982973	          3	
80	2013-09-20 09:30:22	45	0	217	1	22.5	0.0	0.0	82.5	0.0	0.0	42.5	0.0	0.0	62.5	0.0	0.0	52.5	0.0	10.4	-	2.03152	405.803	0.617228	0	303.825	0.3	38179.8	2	1	0.0	12.5	24.9	47.420102	10.982965	          3	
81	2013-09-20 09:29:22	32	0	44	1	20.0	0.0	0.0	87.5	0.0	0.0	42.5	0.0	0.0	65.0	0.0	0.0	53.8	0.0	11.7	-	1.06725	389.342	0.322773	0	302.434	0.1	42755.6	2	1	0.0	12.5	25.2	47.420067	10.982987	          3	
82	2013-09-20 09:37:24	149	0	71	1	42.5	0.0	0.0	65.0	0.0	0.0	50.0	0.0	0.0	57.5	0.0	0.0	53.8	0.0	3.9	-	1.05283	375.989	0.647978	0	615.465	0.1	29003.1	2	1	0.0	12.5	24.7	47.420073	10.982932	          3	
83	2013-09-20 09:27:47	13	0	128	1	12.5	0.0	0.0	95.0	0.0	0.0	40.0	0.0	0.0	67.5	0.0	0.0	53.8	0.0	14.3	-	1.579	380.891	0.422365	0	267.49	0.1	46218.9	2	1	0.0	12.5	26.1	47.420047	10.983022	          3	
84	2013-09-20 09:41:46	210	0	243	1	50.0	0.0	0.0	57.5	0.0	0.0	52.5	0.0	0.0	55.0	0.0	0.0	53.8	0.0	1.3	-	0.988196	379.466	2.65771	0	2689.45	0.4	42245.8	2	1	0.0	12.5	24.8	47.420095	10.982968	          3	
85	2013-09-20 09:33:59	99	0	251	1	35.0	0.0	0.0	72.5	0.0	0.0	47.5	0.0	0.0	60.0	0.0	0.0	53.8	0.0	6.5	-	1.49156	304.827	0.673329	0	451.425	0.2	35454.9	2	1	0.0	12.5	24.5	47.420088	10.982953	          3	
86	2013-09-20 09:39:30	178	0	76	1	47.5	0.0	0.0	62.5	0.0	0.0	52.5	0.0	0.0	57.5	0.0	0.0	55.0	0.0	2.6	-	1.20557	385.965	1.23058	0	1020.75	0.2	32067.9	2	1	0.0	12.5	24.8	47.419928	10.982925	          3	
87	2013-09-20 09:28:33	22	0	131	1	17.5	0.0	0.0	92.5	0.0	0.0	42.5	0.0	0.0	67.5	0.0	0.0	55.0	0.0	13.0	-	1.53434	380.743	0.449844	0	293.183	0.1	46053.1	2	1	0.0	12.5	25.6	47.420078	10.982997	          3	
88	2013-09-20 09:27:13	7	0	144	1	10.0	0.0	0.0	100.0	0.0	0.0	40.0	0.0	0.0	70.0	0.0	0.0	55.0	0.0	15.6	-	1.07222	263.533	-0.113712	0	-106.053	-74.7	-19990.5	4	17	0.0	12.5	26.6	47.420097	10.982985	          3	
89	2013-09-20 09:31:32	62	0	108	1	30.0	0.0	0.0	82.5	0.0	0.0	47.5	0.0	0.0	65.0	0.0	0.0	56.2	0.0	9.1	-	0.931315	374.889	0.310022	0	332.886	0.3	36602.7	2	1	0.0	12.5	24.8	47.420080	10.982972	          3	
90	2013-09-20 09:34:03	100	0	176	1	37.5	0.0	0.0	75.0	0.0	0.0	50.0	0.0	0.0	62.5	0.0	0.0	56.2	0.0	6.5	-	1.01983	389.855	0.409593	0	401.628	0.7	31543.8	2	1	0.0	12.5	24.7	47.420087	10.982955	          3	
91	2013-09-20 09:27:52	14	0	215	1	15.0	0.0	0.0	97.5	0.0	0.0	42.5	0.0	0.0	70.0	0.0	0.0	56.2	0.0	14.3	-	2.20294	439.149	0.439579	0	199.542	4.8	34478.4	4	1	0.0	12.5	26.1	47.420057	10.983023	          3	
92	2013-09-20 09:32:48	80	0	10	1	35.0	0.0	0.0	80.0	0.0	0.0	50.0	0.0	0.0	65.0	0.0	0.0	57.5	0.0	7.8	-	1.18283	304.958	0.317515	0	268.438	0.1	25299.6	2	1	0.0	12.5	24.7	47.420078	10.982980	          3	
93	2013-09-20 09:30:27	46	0	207	1	27.5	0.0	0.0	87.5	0.0	0.0	47.5	0.0	0.0	67.5	0.0	0.0	57.5	0.0	10.4	-	0.920299	369.668	0.28195	0	306.368	0.9	38499.3	2	1	0.0	12.5	24.9	47.420112	10.982965	          3	
94	2013-09-20 09:35:38	124	0	250	1	42.5	0.0	0.0	72.5	0.0	0.0	52.5	0.0	0.0	62.5	0.0	0.0	57.5	0.0	5.2	-	1.53759	406.602	0.0333526	0	21.6915	523.0	1362.92	4	1	0.0	12.5	24.7	47.420048	10.982955	          3	
95	2013-09-20 09:29:26	33	0	31	1	25.0	0.0	0.0	92.5	0.0	0.0	47.5	0.0	0.0	70.0	0.0	0.0	58.8	0.0	11.7	-	1.94698	396.266	0.487333	0	250.302	0.2	35385.7	2	1	0.0	12.5	25.2	47.420085	10.982980	          3	
96	2013-09-20 09:41:54	212	0	177	1	55.0	0.0	0.0	62.5	0.0	0.0	57.5	0.0	0.0	60.0	0.0	0.0	58.8	0.0	1.3	-	0.978732	382.901	2.46212	0	2515.62	0.1	39515.3	2	1	0.0	12.5	24.9	47.420098	10.982972	          3	
97	2013-09-20 09:37:29	150	0	257	1	47.5	0.0	0.0	70.0	0.0	0.0	55.0	0.0	0.0	62.5	0.0	0.0	58.8	0.0	3.9	-	1.11217	377.064	1.34443	0	1208.84	0.1	56965.3	2	1	0.0	12.5	24.5	47.420073	10.982935	          3	
98	2013-09-20 09:28:37	23	0	58	1	22.5	0.0	0.0	97.5	0.0	0.0	47.5	0.0	0.0	72.5	0.0	0.0	60.0	0.0	13.0	-	4.51425	450.629	1.07219	0	237.512	0.0	37308.2	2	1	0.0	12.5	25.6	47.420070	10.983003	          3	
99	2013-09-20 09:30:32	47	0	187	1	30.0	0.0	0.0	90.0	0.0	0.0	50.0	0.0	0.0	70.0	0.0	0.0	60.0	0.0	10.4	-	1.38953	377.285	0.367261	0	264.305	0.3	33213.6	2	1	0.0	12.5	24.9	47.420107	10.982972	          3	
100	2013-09-20 09:29:32	34	0	8	1	27.5	0.0	0.0	95.0	0.0	0.0	50.0	0.0	0.0	72.5	0.0	0.0	61.2	0.0	11.7	-	1.51978	368.582	0.350837	0	230.848	0.5	32635.4	2	1	0.0	12.5	25.2	47.420102	10.982977	          3	
101	2013-09-20 09:41:58	213	0	20	1	57.5	0.0	0.0	65.0	0.0	0.0	60.0	0.0	0.0	62.5	0.0	0.0	61.2	0.0	1.3	-	0.948495	369.996	2.00862	0	2117.69	0.1	33264.6	2	1	0.0	12.5	25.0	47.420108	10.982970	          3	
102	2013-09-20 09:37:34	151	0	98	1	50.0	0.0	0.0	72.5	0.0	0.0	57.5	0.0	0.0	65.0	0.0	0.0	61.2	0.0	3.9	-	0.937145	377.857	0.91829	0	979.88	0.1	46175.8	2	1	0.0	12.5	24.8	47.420063	10.982940	          3	
103	2013-09-20 09:34:11	102	0	113	1	42.5	0.0	0.0	80.0	0.0	0.0	55.0	0.0	0.0	67.5	0.0	0.0	61.2	0.0	6.5	-	1.27329	403.046	0.796653	0	625.665	0.3	49139.6	2	1	0.0	12.5	24.7	47.420097	10.982965	          3	
104	2013-09-20 09:31:40	64	0	193	1	35.0	0.0	0.0	87.5	0.0	0.0	52.5	0.0	0.0	70.0	0.0	0.0	61.2	0.0	9.1	-	1.20677	297.003	0.234436	0	194.268	8.8	21360.8	4	1	0.0	12.5	24.8	47.420075	10.982973	          3	
105	2013-09-20 09:39:40	181	0	105	1	55.0	0.0	0.0	70.0	0.0	0.0	60.0	0.0	0.0	65.0	0.0	0.0	62.5	0.0	2.6	-	0.928181	375.239	1.24455	0	1340.85	0.0	42124	2	1	0.0	12.5	24.8	47.419957	10.982930	          3	
106	2013-09-20 09:35:45	125	0	122	1	47.5	0.0	0.0	77.5	0.0	0.0	57.5	0.0	0.0	67.5	0.0	0.0	62.5	0.0	5.2	-	1.42	395.149	1.15481	0	813.245	0.2	51097.7	2	1	0.0	12.5	24.5	47.420035	10.982948	          3	
107	2013-09-20 09:28:42	24	0	246	1	25.0	0.0	0.0	100.0	0.0	0.0	50.0	0.0	0.0	75.0	0.0	0.0	62.5	0.0	13.0	-	2.22822	443.488	0.487881	0	218.956	0.3	34393.5	2	1	0.0	12.5	25.6	47.420077	10.982988	          3	
108	2013-09-20 09:31:47	65	0	35	1	37.5	0.0	0.0	90.0	0.0	0.0	55.0	0.0	0.0	72.5	0.0	0.0	63.8	0.0	9.1	-	1.14822	382.686	0.495627	0	431.647	0.1	47462.1	2	1	0.0	12.5	24.7	47.420090	10.982963	          3	
109	2013-09-20 09:29:37	35	0	66	1	30.0	0.0	0.0	97.5	0.0	0.0	52.5	0.0	0.0	75.0	0.0	0.0	63.8	0.0	11.7	-	1.23561	374.616	0.79644	0	644.573	34.3	91124.3	4	1	0.0	12.5	24.9	47.420127	10.982965	          3	
110	2013-09-20 09:42:03	214	0	115	1	60.0	0.0	0.0	67.5	0.0	0.0	62.5	0.0	0.0	65.0	0.0	0.0	63.8	0.0	1.3	-	1.09768	389.861	2.69716	0	2457.15	0.1	38596.8	2	1	0.0	12.5	25.0	47.420117	10.982968	          3	
111	2013-09-20 09:32:57	83	0	40	1	42.5	0.0	0.0	87.5	0.0	0.0	57.5	0.0	0.0	72.5	0.0	0.0	65.0	0.0	7.8	-	1.28388	390.483	0.786505	0	612.601	0.1	57736.3	2	1	0.0	12.5	24.7	47.420087	10.982975	          3	
112	2013-09-20 09:30:40	49	0	72	1	35.0	0.0	0.0	95.0	0.0	0.0	55.0	0.0	0.0	75.0	0.0	0.0	65.0	0.0	10.4	-	5.28414	456.894	2.06108	0	390.051	0.0	49015.2	2	1	0.0	12.5	24.9	47.420108	10.982973	          3	
113	2013-09-20 09:39:45	182	0	201	1	57.5	0.0	0.0	72.5	0.0	0.0	62.5	0.0	0.0	67.5	0.0	0.0	65.0	0.0	2.6	-	1.33222	396.937	2.09496	0	1572.53	0.1	49402.5	2	1	0.0	12.5	24.8	47.419950	10.982930	          3	
114	2013-09-20 09:34:16	103	0	45	1	47.5	0.0	0.0	85.0	0.0	0.0	60.0	0.0	0.0	72.5	0.0	0.0	66.2	0.0	6.5	-	1.4803	396.61	1.01927	0	688.554	0.1	54078.9	2	1	0.0	12.5	24.7	47.420107	10.982970	          3	
115	2013-09-20 09:42:08	215	0	209	1	62.5	0.0	0.0	70.0	0.0	0.0	65.0	0.0	0.0	67.5	0.0	0.0	66.2	0.0	1.3	-	1.02099	374.305	2.63975	0	2585.48	0.0	40612.6	2	1	0.0	12.5	24.9	47.420118	10.982967	          3	
116	2013-09-20 09:37:41	153	0	222	1	55.0	0.0	0.0	77.5	0.0	0.0	62.5	0.0	0.0	70.0	0.0	0.0	66.2	0.0	3.9	-	1.1082	392.32	0.835302	0	753.749	0.9	35519.6	2	1	0.0	12.5	24.7	47.420040	10.982940	          3	
117	2013-09-20 09:30:44	50	0	159	1	37.5	0.0	0.0	97.5	0.0	0.0	57.5	0.0	0.0	77.5	0.0	0.0	67.5	0.0	10.4	-	1.04618	380.118	0.428039	0	409.146	0.2	51414.7	2	1	0.0	12.5	24.9	47.420115	10.982972	          3	
118	2013-09-20 09:39:49	183	0	225	1	60.0	0.0	0.0	75.0	0.0	0.0	65.0	0.0	0.0	70.0	0.0	0.0	67.5	0.0	2.6	-	1.20182	394.492	1.4316	0	1191.19	2.2	37422.5	4	1	0.0	12.5	24.8	47.419940	10.982930	          3	
119	2013-09-20 09:42:13	216	0	47	1	65.0	0.0	0.0	72.5	0.0	0.0	67.5	0.0	0.0	70.0	0.0	0.0	68.8	0.0	1.3	-	0.923212	375.029	2.07122	0	2243.49	0.2	35240.7	2	1	0.0	12.5	24.9	47.420110	10.982967	          3	
120	2013-09-20 09:37:46	154	0	52	1	57.5	0.0	0.0	80.0	0.0	0.0	65.0	0.0	0.0	72.5	0.0	0.0	68.8	0.0	3.9	-	1.11458	389.115	0.894773	0	802.788	0.0	37830.5	2	1	0.0	12.5	24.8	47.420010	10.982940	          3	
121	2013-09-20 09:31:54	67	0	166	1	42.5	0.0	0.0	95.0	0.0	0.0	60.0	0.0	0.0	77.5	0.0	0.0	68.8	0.0	9.1	-	2.96763	446.337	1.64272	0	553.547	0.1	60865.7	2	1	0.0	12.5	24.7	47.420108	10.982953	          3	
122	2013-09-20 09:39:56	184	0	68	1	62.5	0.0	0.0	77.5	0.0	0.0	67.5	0.0	0.0	72.5	0.0	0.0	70.0	0.0	2.6	-	1.23711	390.908	1.2882	0	1041.29	0.1	32713.2	2	1	0.0	12.5	24.8	47.419952	10.982928	          3	
123	2013-09-20 09:35:54	128	0	101	1	55.0	0.0	0.0	85.0	0.0	0.0	65.0	0.0	0.0	75.0	0.0	0.0	70.0	0.0	5.2	-	1.15583	396.735	0.832781	0	720.502	0.2	45270.5	2	1	0.0	12.5	24.7	47.420037	10.982943	          3	
124	2013-09-20 09:33:02	84	0	181	1	47.5	0.0	0.0	92.5	0.0	0.0	62.5	0.0	0.0	77.5	0.0	0.0	70.0	0.0	7.8	-	2.27527	442.169	1.32151	0	580.815	0.2	54740.5	2	1	0.0	12.5	24.7	47.420088	10.982972	          3	
125	2013-09-20 09:42:18	217	0	73	1	67.5	0.0	0.0	75.0	0.0	0.0	70.0	0.0	0.0	72.5	0.0	0.0	71.2	0.0	1.3	-	2.279	442.724	6.49751	0	2851.04	0.6	44784	2	1	0.0	12.5	25.0	47.420090	10.982967	          3	
126	2013-09-20 09:37:51	155	0	109	1	60.0	0.0	0.0	82.5	0.0	0.0	67.5	0.0	0.0	75.0	0.0	0.0	71.2	0.0	3.9	-	0.916041	376.985	0.871111	0	950.952	0.1	44812.6	2	1	0.0	12.5	24.7	47.419990	10.982932	          3	
127	2013-09-20 09:33:07	85	0	13	1	50.0	0.0	0.0	95.0	0.0	0.0	65.0	0.0	0.0	80.0	0.0	0.0	72.5	0.0	7.8	-	1.30008	373.196	0.57539	0	442.579	0.3	41712.1	2	1	0.0	12.5	24.7	47.420072	10.982967	          3	
128	2013-09-20 09:35:59	129	0	195	1	57.5	0.0	0.0	87.5	0.0	0.0	67.5	0.0	0.0	77.5	0.0	0.0	72.5	0.0	5.2	-	1.12989	381.144	0.83565	0	739.585	0.1	46469.5	2	1	0.0	12.5	24.7	47.420042	10.982945	          3	
129	2013-09-20 09:34:25	106	0	21	1	55.0	0.0	0.0	92.5	0.0	0.0	67.5	0.0	0.0	80.0	0.0	0.0	73.8	0.0	6.5	-	1.43054	386.777	0.809287	0	565.723	0.3	44431.8	2	1	0.0	12.5	24.7	47.420113	10.982973	          3	
130	2013-09-20 09:31:58	68	0	41	1	47.5	0.0	0.0	100.0	0.0	0.0	65.0	0.0	0.0	82.5	0.0	0.0	73.8	0.0	9.1	-	2.3156	441.12	1.34466	0	580.694	0.1	63850.7	2	1	0.0	12.5	24.7	47.420117	10.982948	          3	
131	2013-09-20 09:42:22	218	0	125	1	70.0	0.0	0.0	77.5	0.0	0.0	72.5	0.0	0.0	75.0	0.0	0.0	73.8	0.0	1.3	-	1.13057	370.108	2.34023	0	2069.96	0.0	32514.9	2	1	0.0	12.5	25.0	47.420088	10.982972	          3	
132	2013-09-20 09:37:56	156	0	202	1	62.5	0.0	0.0	85.0	0.0	0.0	70.0	0.0	0.0	77.5	0.0	0.0	73.8	0.0	3.9	-	1.28021	389.178	1.14081	0	891.111	1.9	41992.6	2	1	0.0	12.5	24.5	47.419985	10.982932	          3	
133	2013-09-20 09:36:05	130	0	38	1	60.0	0.0	0.0	90.0	0.0	0.0	70.0	0.0	0.0	80.0	0.0	0.0	75.0	0.0	5.2	-	1.35521	378.073	1.44596	0	1066.97	2.3	67039.6	4	1	0.0	12.5	24.5	47.420037	10.982945	          3	
134	2013-09-20 09:40:03	186	0	211	1	67.5	0.0	0.0	82.5	0.0	0.0	72.5	0.0	0.0	77.5	0.0	0.0	75.0	0.0	2.6	-	1.42116	395.419	2.31009	0	1625.49	0.0	51066.4	2	1	0.0	12.5	24.8	47.419982	10.982930	          3	
135	2013-09-20 09:42:27	219	0	114	1	72.5	0.0	0.0	80.0	0.0	0.0	75.0	0.0	0.0	77.5	0.0	0.0	76.2	0.0	1.3	-	1.05102	388.679	-1.49636	0	-1423.73	-1.4	-22363.8	4	17	0.0	12.5	24.8	47.420075	10.982975	          3	
136	2013-09-20 09:34:30	107	0	127	1	57.5	0.0	0.0	95.0	0.0	0.0	70.0	0.0	0.0	82.5	0.0	0.0	76.2	0.0	6.5	-	2.4292	444.567	2.41885	0	995.739	0.8	78205.2	2	1	0.0	12.5	24.4	47.420130	10.982977	          3	
137	2013-09-20 09:36:11	131	0	130	1	62.5	0.0	0.0	92.5	0.0	0.0	72.5	0.0	0.0	82.5	0.0	0.0	77.5	0.0	5.2	-	1.61474	373.668	1.70149	0	1053.72	0.1	66207.4	2	1	0.0	12.5	24.5	47.420045	10.982953	          3	
138	2013-09-20 09:33:14	87	0	141	1	55.0	0.0	0.0	100.0	0.0	0.0	70.0	0.0	0.0	85.0	0.0	0.0	77.5	0.0	7.8	-	1.4227	382.564	1.38115	0	970.796	1.5	91495.4	4	1	0.0	12.5	24.5	47.420073	10.982960	          3	
139	2013-09-20 09:40:07	187	0	200	1	70.0	0.0	0.0	85.0	0.0	0.0	75.0	0.0	0.0	80.0	0.0	0.0	77.5	0.0	2.6	-	1.17656	367.35	0.652893	0	554.919	6.3	17433.3	4	1	0.0	12.5	24.9	47.419997	10.982932	          3	
140	2013-09-20 09:38:03	158	0	25	1	67.5	0.0	0.0	90.0	0.0	0.0	75.0	0.0	0.0	82.5	0.0	0.0	78.8	0.0	3.9	-	3.06604	449.071	2.22749	0	726.503	2.0	34235.6	4	1	0.0	12.5	24.7	47.419953	10.982923	          3	
141	2013-09-20 09:42:34	220	0	208	1	75.0	0.0	0.0	82.5	0.0	0.0	77.5	0.0	0.0	80.0	0.0	0.0	78.8	0.0	1.3	-	1.60707	400.461	3.64093	0	2265.58	0.1	35587.6	2	1	0.0	12.5	25.0	47.420085	10.982978	          3	
142	2013-09-20 09:34:35	108	0	214	1	60.0	0.0	0.0	97.5	0.0	0.0	72.5	0.0	0.0	85.0	0.0	0.0	78.8	0.0	6.5	-	1.21459	376.132	1.1364	0	935.624	0.1	73483.7	2	1	0.0	12.5	24.7	47.420127	10.982972	          3	
143	2013-09-20 09:40:14	188	0	32	1	72.5	0.0	0.0	87.5	0.0	0.0	77.5	0.0	0.0	82.5	0.0	0.0	80.0	0.0	2.6	-	1.06411	382.073	1.33342	0	1253.08	0.1	39366.7	2	1	0.0	12.5	24.8	47.420015	10.982935	          3	
144	2013-09-20 09:36:16	132	0	111	1	65.0	0.0	0.0	95.0	0.0	0.0	75.0	0.0	0.0	85.0	0.0	0.0	80.0	0.0	5.2	-	1.2315	364.166	2.77058	0	2249.75	2.5	141356	4	1	0.0	12.5	24.5	47.420050	10.982953	          3	
145	2013-09-20 09:42:38	221	0	46	1	77.5	0.0	0.0	85.0	0.0	0.0	80.0	0.0	0.0	82.5	0.0	0.0	81.2	0.0	1.3	-	1.49072	394.732	4.2078	0	2822.67	0.5	44338.3	2	1	0.0	12.5	25.2	47.420100	10.982985	          3	
146	2013-09-20 09:38:10	159	0	129	1	70.0	0.0	0.0	92.5	0.0	0.0	77.5	0.0	0.0	85.0	0.0	0.0	81.2	0.0	3.9	-	1.50301	356.768	1.76501	0	1174.31	0.0	55338.1	2	1	0.0	12.5	24.7	47.419945	10.982920	          3	
147	2013-09-20 09:34:40	109	0	136	1	62.5	0.0	0.0	100.0	0.0	0.0	75.0	0.0	0.0	87.5	0.0	0.0	81.2	0.0	6.5	-	1.63887	373.069	2.03934	0	1244.36	1.3	97732	4	1	0.0	12.5	24.7	47.420108	10.982978	          3	
148	2013-09-20 09:40:19	189	0	132	1	75.0	0.0	0.0	90.0	0.0	0.0	80.0	0.0	0.0	85.0	0.0	0.0	82.5	0.0	2.6	-	3.82853	453.594	5.39276	0	1408.57	0.1	44251.5	2	1	0.0	12.5	24.8	47.420015	10.982933	          3	
149	2013-09-20 09:36:23	133	0	213	1	67.5	0.0	0.0	97.5	0.0	0.0	77.5	0.0	0.0	87.5	0.0	0.0	82.5	0.0	5.2	-	2.49141	445.468	3.06748	0	1231.22	0.1	77359.9	2	1	0.0	12.5	24.7	47.420027	10.982945	          3	
150	2013-09-20 09:42:43	222	0	137	1	80.0	0.0	0.0	87.5	0.0	0.0	82.5	0.0	0.0	85.0	0.0	0.0	83.8	0.0	1.3	-	0.922787	377.972	2.25036	0	2438.65	0.1	38306.3	2	1	0.0	12.5	25.0	47.420082	10.982985	          3	
151	2013-09-20 09:38:15	160	0	216	1	72.5	0.0	0.0	95.0	0.0	0.0	80.0	0.0	0.0	87.5	0.0	0.0	83.8	0.0	3.9	-	2.18116	442.499	3.1786	0	1457.3	0.3	68673.6	2	1	0.0	12.5	24.8	47.419940	10.982917	          3	
152	2013-09-20 09:40:23	190	0	221	1	77.5	0.0	0.0	92.5	0.0	0.0	82.5	0.0	0.0	87.5	0.0	0.0	85.0	0.0	2.6	-	2.30911	443.841	3.98978	0	1727.85	0.1	54281.9	2	1	0.0	12.5	24.8	47.420025	10.982938	          3	
153	2013-09-20 09:36:28	134	0	234	1	70.0	0.0	0.0	100.0	0.0	0.0	80.0	0.0	0.0	90.0	0.0	0.0	85.0	0.0	5.2	-	1.53202	360.454	2.17527	0	1419.87	0.2	89213.1	2	1	0.0	12.5	24.5	47.420018	10.982942	          3	
154	2013-09-20 09:38:19	161	0	53	1	75.0	0.0	0.0	97.5	0.0	0.0	82.5	0.0	0.0	90.0	0.0	0.0	86.2	0.0	3.9	-	2.98476	449.07	5.08191	0	1702.62	0.1	80233.9	2	1	0.0	12.5	24.8	47.419943	10.982920	          3	
155	2013-09-20 09:42:48	223	0	230	1	82.5	0.0	0.0	90.0	0.0	0.0	85.0	0.0	0.0	87.5	0.0	0.0	86.2	0.0	1.3	-	2.23965	440.653	7.71221	0	3443.5	0.1	54090.3	2	1	0.0	12.5	25.0	47.420087	10.982990	          3	
156	2013-09-20 09:40:27	191	0	60	1	80.0	0.0	0.0	95.0	0.0	0.0	85.0	0.0	0.0	90.0	0.0	0.0	87.5	0.0	2.6	-	1.52337	389.743	3.34243	0	2194.1	0.1	68929.8	2	1	0.0	12.5	24.9	47.420043	10.982945	          3	
157	2013-09-20 09:42:53	224	0	67	1	85.0	0.0	0.0	92.5	0.0	0.0	87.5	0.0	0.0	90.0	0.0	0.0	88.8	0.0	1.3	-	2.47974	445.503	6.09614	0	2458.38	0.0	38616.2	2	1	0.0	12.5	25.0	47.420090	10.982997	          3	
158	2013-09-20 09:38:23	162	0	84	1	77.5	0.0	0.0	100.0	0.0	0.0	85.0	0.0	0.0	92.5	0.0	0.0	88.8	0.0	3.9	-	2.35836	444.014	4.49067	0	1904.15	0.0	89730.9	2	1	0.0	12.5	24.8	47.419940	10.982922	          3	
159	2013-09-20 09:40:32	192	0	148	1	82.5	0.0	0.0	97.5	0.0	0.0	87.5	0.0	0.0	92.5	0.0	0.0	90.0	0.0	2.6	-	1.64877	379.787	3.65343	0	2215.85	0.0	69613	2	1	0.0	12.5	24.7	47.420055	10.982945	          3	
160	2013-09-20 09:42:57	225	0	155	1	87.5	0.0	0.0	95.0	0.0	0.0	90.0	0.0	0.0	92.5	0.0	0.0	91.2	0.0	1.3	-	1.59946	384.574	4.54789	0	2843.39	0.1	44663.8	2	1	0.0	12.5	25.2	47.420072	10.982993	          3	
161	2013-09-20 09:40:36	193	0	180	1	85.0	0.0	0.0	100.0	0.0	0.0	90.0	0.0	0.0	95.0	0.0	0.0	92.5	0.0	2.6	-	2.52751	445.918	5.49121	0	2172.57	0.1	68253.4	2	1	0.0	12.5	24.9	47.420067	10.982952	          3	
162	2013-09-20 09:43:01	226	0	254	1	90.0	0.0	0.0	97.5	0.0	0.0	92.5	0.0	0.0	95.0	0.0	0.0	93.8	0.0	1.3	-	4.5778	455.082	12.1868	0	2662.16	0.0	41817	2	1	0.0	12.5	25.0	47.420062	10.982992	          3	
163	2013-09-20 09:43:05	227	0	30	1	92.5	0.0	0.0	100.0	0.0	0.0	95.0	0.0	0.0	97.5	0.0	0.0	96.2	0.0	1.3	-	4.5346	456.645	13.2439	0	2920.63	0.0	45877.2	2	1	0.0	12.4	25.2	47.420058	10.982988	          3	

-------------------------------------------------------------------------------
Electrode test result:
Measured resistans is an estimated maximal electrode resistance:
X	Y	Z	Estimatet max resistance	Test current	Status	User
0.000000	0.000000	0.000000	118696	0.001	OK	
2.500000	0.000000	0.000000	157392	0.003	OK	
5.000000	0.000000	0.000000	197615	0.002	OK	
7.500000	0.000000	0.000000	130706	0.004	OK	
10.000000	0.000000	0.000000	188490	0.002	OK	
12.500000	0.000000	0.000000	199908	0.002	OK	
15.000000	0.000000	0.000000	133596	0.003	OK	
17.500000	0.000000	0.000000	191368	0.002	OK	
20.000000	0.000000	0.000000	164936	0.003	OK	
22.500000	0.000000	0.000000	35751	0.005	OK	
25.000000	0.000000	0.000000	149408	0.003	OK	
27.500000	0.000000	0.000000	199016	0.002	OK	
30.000000	0.000000	0.000000	107947	0.002	OK	
32.500000	0.000000	0.000000	131365	0.001	OK	
35.000000	0.000000	0.000000	45760	0.005	OK	
37.500000	0.000000	0.000000	117946	0.001	OK	
40.000000	0.000000	0.000000	133865	0.001	OK	
42.500000	0.000000	0.000000	109992	0.004	OK	
45.000000	0.000000	0.000000	257014	0.000	Bad	
45.000000	0.000000	0.000000	208678	0.001	Bad	
45.000000	0.000000	0.000000	204630	0.001	Bad	
45.000000	0.000000	0.000000	202036	0.001	Bad	
47.500000	0.000000	0.000000	143098	0.003	OK	
50.000000	0.000000	0.000000	108898	0.002	OK	
52.500000	0.000000	0.000000	193980	0.002	OK	
55.000000	0.000000	0.000000	103943	0.002	OK	
57.500000	0.000000	0.000000	140928	0.003	OK	
60.000000	0.000000	0.000000	109944	0.002	OK	
62.500000	0.000000	0.000000	178544	0.003	OK	
65.000000	0.000000	0.000000	111125	0.002	OK	
67.500000	0.000000	0.000000	116006	0.004	OK	
70.000000	0.000000	0.000000	179687	0.003	OK	
72.500000	0.000000	0.000000	158270	0.003	OK	
75.000000	0.000000	0.000000	86473	0.005	OK	
77.500000	0.000000	0.000000	139202	0.003	OK	
80.000000	0.000000	0.000000	101540	0.002	OK	
82.500000	0.000000	0.000000	162542	0.003	OK	
85.000000	0.000000	0.000000	128416	0.004	OK	
87.500000	0.000000	0.000000	101061	0.002	OK	
90.000000	0.000000	0.000000	37192	0.005	OK	
92.500000	0.000000	0.000000	55681	0.005	OK	
95.000000	0.000000	0.000000	45374	0.005	OK	
97.500000	0.000000	0.000000	69665	0.005	OK	
100.000000	0.000000	0.000000	52294	0.005	OK	
-------------------------------------------------------------------------------
Measurement log:
Time	Latitude	Longitude	Pos.Quality	Source	Type	MeasID	Description
2013-09-20 09:21:11	47.420092	10.983003	3		Instrument	-1	Measuring Started. (260 data points requested.)
2013-09-20 09:21:12	47.420090	10.983002	3	B3 [8,0] 0x373202	Switch	-1	Relay expected ON - is OFF
2013-09-20 09:21:13	47.420090	10.983002	3	B3 [8,0] 0x373202	Switch	-1	Relay expected ON - is OFF
2013-09-20 09:21:14	47.420088	10.983002	3	B3 [8,0] 0x373202	Switch	-1	Relay expected ON - is OFF
2013-09-20 09:21:15	47.420088	10.983002	3	B3 [8,0] 0x373202	Switch	-1	Relay expected ON - is OFF
2013-09-20 09:21:50	47.420080	10.983000	3		Instrument	-1	Electrode test FAIL (OK:40 Bad:1 Fail:0)
2013-09-20 09:22:58	47.420068	10.983008	3		Instrument	-1	Measuring Started. (260 data points requested.)
2013-09-20 09:23:00	47.420075	10.983002	3		Instrument	-1	Electrode test FAIL (OK:40 Bad:1 Fail:0)
2013-09-20 09:24:18	47.420115	10.982983	3		Instrument	-1	Measuring Started. (260 data points requested.)
2013-09-20 09:24:20	47.420118	10.982983	3		Instrument	-1	Electrode test FAIL (OK:40 Bad:1 Fail:0)
2013-09-20 09:25:38	47.420057	10.982990	3		Instrument	-1	Measuring Started. (260 data points requested.)
2013-09-20 09:25:40	47.420057	10.982988	3		Instrument	-1	Electrode test FAIL (OK:40 Bad:1 Fail:0)
2013-09-20 09:26:40	47.420087	10.982997	3		Instrument	-1	Measuring Started. (260 data points requested.)
2013-09-20 09:26:40	47.420087	10.982998	3		Instrument	-1	Electrode test OK (OK:40 Bad:1 Fail:0)
2013-09-20 09:26:48	47.420085	10.983003	3		Transmitter	2	Load resistance too high or No contact?
Tx  :1-2 2-21
Estimated load: 240.95kΩ
Current:564μA
 Status code:
TX status 0x40000Command parameters out of range 
2013-09-20 09:27:25	47.420082	10.983003	3		Receiver	7	NEGATIVE RESISTIVITY
Tx  :1-5 2-21 1.07mA
Rx 1:1-17 2-9 dV=-113.7mV ( -367.5mV -338.9mV -508.3mV -425.4mV -384.8mV 33.13mV -134.6mV -348.6mV -305.0mV 85.79mV -88.80mV -328.5mV -270.7mV 114.4mV -72.68mV -298.9mV)

2013-09-20 09:34:40	47.420103	10.982980	3	B3 [3,11] 0x373202	Switch	109	Relay expected ON - is OFF
2013-09-20 09:36:17	47.420050	10.982953	3	B3 [3,11] 0x373202	Switch	132	Relay expected ON - is OFF
2013-09-20 09:38:04	47.419948	10.982922	3	B3 [3,11] 0x373202	Switch	158	Relay expected ON - is OFF
2013-09-20 09:40:08	47.420002	10.982932	3	B3 [3,11] 0x373202	Switch	187	Relay expected ON - is OFF
2013-09-20 09:43:10	47.420062	10.982990	3		Instrument	227	Measuring done
