# Supplementary material for: A temperature-dependent mechanical model to assess the stability of degrading permafrost rock slopes
Source: Copernicus journal article supplement (doi:10.5194/esurf-9-1125-2021), 2021-09-09
Supplement: Supplementary file 3 [file esurf-9-1125-2021-supplement.zip › Dataset S14. Results_numerical model_Fig. 6,7,8,9,S7,S8,S9.xlsx]

## Sheet: Zugspitze_Displ+FoS
Sect. 4.1: Zugspitze model
Displacements and factors of safety
Model stage	Description	Max displacement (mm)	FoS	Absolute change in displacements (mm)
1	30% joint persistence	7.619	10.86
2	50% joint persistence	7.7889		0.1699
3	70% joint persistence	7.7886		-0.0003
4	90% joint persistence	7.701	2.55	-0.0876
5	warming 0: -4°C	7.6854	3.35	-0.0156
6	warming 1: -3°C	7.6964		0.011
7	warming 2: -2°C	7.8123		0.1159
8	warming 3: -1°C	7.867		0.0547
9	warming 4: -0.5°C	8.1831	1.25	0.3161
10	thawing 0	141.05	0.64	132.867
11	thawing 1	419.51	0.62	278.46
12	thawing 2	520.41		100.9
13	thawing 3	616.76		96.35
14	thawing 4	689.74		72.98
15	all unfrozen	776.31	0.63	86.57

## Sheet: Displacement VS Slope angle
Sect. 4.2: Simplified permafrost rock slope with rising temperature
3000 cycles for each warming step
		Absolute maximum displacement (mm)					Relative change in displacement (%/°C)		Absolute change (mm/°C)
	Angle (°) / Temp. (°C)	-4°C	-3°C	-2°C	-1°C	-0,5°C	-4 to -2°C	-2 to -0.5°C	-4 to -2°C	-2 to -0.5°C
	30	2.5222	2.5223	2.5248	2.5327	2.7489	0.0515423	5.9173	0.0013	0.1494
	40	4.9748	5.3634	5.3975	5.6269	6.1573	4.24841	9.38459	0.21135	0.506533
	45	6.5684	6.3625	6.4157	6.52	7.4712	-1.16238	10.9679	-0.07635	0.703667
	50	9.4546	10.308	10.469	10.607	12.095	5.36458	10.3544	0.5072	1.084
	55	15.82	16.183	16.926	17.63	27.434	3.49558	41.388	0.553	7.00533
	57.5	34.351	37.138	38.113	40.519	55.735	5.47582	30.8241	1.881	11.748
	60	35.184	36.987	37.688	39.605	58.281	3.55844	36.4272	1.252	13.7287
	62	33.574	37.235	39.698	45.231	66.72	9.12015	45.3793	3.062	18.0147
	64	97.864	90.496	95.334	111.13	136.65	-1.29261	28.8921	-1.265	27.544
	65	152.39	167.32	165.06	206.15	224.33	4.1571	23.9388	6.335	39.5133
	66	167.8	197.45	212.46	296.82	315.5	13.3075	32.3324	22.33	68.6933
	69	289.72	274.71	289.5	352.75	355.74	-0.0379677	15.2539	-0.11	44.16
Relative increase in displacements (% of mm/°)	30 to 40	9.72405	11.2639	11.3779	12.217	12.3991	Means				Domain
	40 to 45	6.40669	3.72562	3.77286	3.17439	4.26778	2.12554	9.15604	0.160875	0.6109	30-50
	45 to 50	8.78814	12.4024	12.6356	12.5368	12.3777	5.4125	38.5046	1.687	12.6242	55-62
	50 to 55	13.4652	11.3989	12.3355	13.2422	25.3642	4.03351	25.1043	6.8225	44.9777	62-69
	55 to 57,5	46.8546	51.7951	50.0697	51.9319	41.2641
	57,5 to 60	0.969986	-0.162637	-0.446042	-0.902293	1.82722
	60 to 62	-2.28797	0.335253	2.66663	7.10264	7.23992
	62 to 64	95.7437	71.5201	70.0741	72.8472	52.4056
	64 to 65	55.7161	84.8921	73.1386	85.5035	64.1639
	65 to 66	10.1122	18.0074	28.7168	43.9825	40.641
	66 to 69	24.2193	13.043	12.087	6.28102	4.25145
	Factor of increase D1-D2	3.47968	4.54386	4.059	3.9217	2.04919	3.61069
	Factor of increase D2-D3	42.6277	213.332	26.2781	10.2564	7.23842	59.9465
Absolute increase in displacements (mm/°)	30 to 40	0.24526	0.28411	0.28727	0.30942	0.34084
	40 to 45	0.31872	0.19982	0.20364	0.17862	0.26278
	45 to 50	0.57724	0.7891	0.81066	0.8174	0.92476
	50 to 55	1.27308	1.175	1.2914	1.4046	3.0678
	55 to 57,5	7.4124	8.382	8.4748	9.1556	11.3204
	57,5 to 60	0.3332	-0.0604	-0.17	-0.3656	1.0184
	60 to 62	-0.805	0.124	1.005	2.813	4.2195
	62 to 64	32.145	26.6305	27.818	32.9495	34.965
	64 to 65	54.526	76.824	69.726	95.02	87.68
	65 to 66	15.41	30.13	47.4	90.67	91.17
	66 to 69	40.64	25.7533	25.68	18.6433	13.4133
	Factor of increase D1-D2	5.82241	7.13362	6.56249	6.5183	3.69007	5.94538
	Factor of increase D2-D3	40.6852	214.762	27.6796	11.7133	8.28653	60.6253
Sect. 5.1
6000 cycles for each warming step
	Displacement (mm) for different temperatures (°C)
Angle (°) / Temp. (°C)	-4°C	-3°C	-2°C	-1°C	-0,5°C
30	2.5222	2.5223	2.5245	2.5338	2.7602
40	4.9748	5.1232	5.1482	5.5509	6.1072
45	6.5684	6.3472	6.3759	6.563	8.0066
50	9.4546	10.619	10.753	10.882	12.455
55	15.82	16.37	17.078	18.296	27.592
57.5	34.341	35.458	38.3	40.295	86.128
60	35.184	36.249	36.897	39.068	98.446
62	33.574	39.131	40.939	49.512	140.93
64	113.9	98.366	100.5	154.25	258.77
65	150.89	162.37	171.72	292.04	402.31
66	162.55	183.88	216.12	532.2	567.13
69	198.65	219.77	257.19	563.66	584.32
Sect. 5.1
Modelling start: -2°C
Slope angle (°)	Displacement (mm) for different temperatures (°C)
	-2°C	-1°C	-0,5°C
30	2.524	2.5323	2.7777
40	5.5516	5.286	6.347
45	6.6168	6.852	7.6557
50	10.618	10.838	12.758
55	16.565	17.742	27.7
57.5	39.732	40.049	51.173
60	37.43	39.547	52.323
62	40.432	42.873	63.417
64	123.26	139.88	171.66
65	164.76	244.18	252.2
66	195.72	273.73	282.19
69	294.55	372.86	379.52
Sect. 5.1 and Sect. 5.4
Model runs with strength and deformability one order of magnitude higher
Slope angle (°)	Maximum displacement (mm) for different temperatures (°C)
	-4°C	-3°C	-2°C	-1°C	-0,5°C
30	1.8195	1.8198	1.8209	1.8219	1.9591
40	3.0678	3.0422	3.2064	3.1487	3.5163
45	3.5827	3.5786	3.5477	3.6128	4.1683
50	7.1118	7.6002	7.6482	7.7158	8.2263
55	12.33	13.25	13.501	14.076	14.68
57.5	17.878	20.132	20.492	22.219	26.941
60	21.239	22.336	22.597	23.749	29.759
62	19.017	20.494	20.882	22.616	26.518
64	53.174	56.451	57.06	64.566	70.346
65	72.763	87.143	89.707	96.733	97.817
66	70.781	78.544	83.646	87.823	88.695
Sect. 5.1 and Sect. 5.4
Various strength and deformability levels of the rock mass at -4°C and with a slope angle of 60°
Rock mass level / Joint persistence	Maximum displacement [mm]
	90%	100%	Description
-4	95.505	96.572	low strength values
-3	59.032	72.631
-2	47.725	44.889
-1	46.425	44.023
0	36.316	35.184	values of the Zugspitze model
1	23.973	24.981
2	22.25	23.597
3	25.233	27.109
4	34.677	35.311	equivalent to model runs in the table above
5	29.082	29.504	high strength values

## Sheet: FoS VS Slope angle
Sect. 4.2: Simplified permafrost rock slope with rising temperature
	Factor of safety					Absolute decrease FoS/°C		Decrease in %/°C
Angle (°) / Temp. (°C)	-4°C	-3°C	-2°C	-1°C	-0,5°C	-4 to -2°C	-2 to -0.5°C	-4 to -2°C	-2 to -0.5°C	Reducing factor
30	4.9	3.66	3.03	2.2	1.58	0.935	0.966667	19.0816	31.9032	3.10127
40	4.08	3.08	2.5	1.87	1.32	0.79	0.786667	19.3627	31.4667	3.09091
45	3.81	2.86	2.32	1.7	1.24	0.745	0.72	19.5538	31.0345	3.07258
50	3.44	2.53	2.02	1.51	1.08	0.71	0.626667	20.6395	31.0231	3.18519
55	3.04	2.3	1.79	1.36	0.98	0.625	0.54	20.5592	30.1676	3.10204
57.5	2.65	2.08	1.65	1.24	0.9	0.5	0.5	18.8679	30.303	2.94444
60	2.65	1.99	1.62	1.19	0.87	0.515	0.5	19.434	30.8642	3.04598
62	2.17	1.47	1.31	0.98	0.82	0.43	0.326667	19.8157	24.9364	2.64634
64	1.99	1.49	1.09	0.92	0.63	0.45	0.306667	22.6131	28.1346	3.15873
65	1.71	1.35	1.1	0.86	0.65	0.305	0.3	17.8363	27.2727	2.63077
66	1.42	1.11	0.89	0.65	0.57	0.265	0.213333	18.662	23.97	2.49123
69	1.33	0.99	0.81	0.65	0.2	0.26	0.406667	19.5489	50.2058	6.65
					Means	0.795	0.775	19.6594	31.3569	3.25996	Mean
						0.5175	0.466667	19.6692	29.0678	1.04605	Standard deviation
						0.32	0.306667	19.665	32.3958

## Sheet: Orientation of fracture network
Sect. 4.2: Simplified permafrost rock slope with rising temperature
		Maximum displacements (mm) for different rotations of the fracture network from the Zugspitze case (°)
	Slope angle (°)	0	15	30	45	60	75	90	105	120	135	150	165
	30	2.5222	3.2338	1.3911	1.4452	1.484	2.0822	4.0876	7.4683	1.6411	1.8773	2.8536	1.653
	40	4.9748	5.1264	1.5434	1.5084	1.5787	2.9702	7.3177	13.79	1.7448	2.3892	2.919	1.9996
	45	6.5684	5.2184	1.5828	1.5119	1.6382	2.8359	9.5039	14.702	1.7681	3.3523	3.6023	2.2493
	50	9.5438	10.671	2.0554	1.6093	1.6845	6.4269	12.143	30.039	1.8403	3.3454	5.0919	2.1447
	55	15.869	16.139	1.94	1.6435	1.9889	8.7217	23.876	37.803	1.8663	4.1185	5.8935	2.6828
	57.5	34.58	16.551	2.0426	1.8375	2.5409	13.183	23.757	40.99	1.9821	5.4585	6.2545	3.2317
	60	35.214	34.991	2.0103	1.7811	2.706	13.087	44.639	45.554	1.9843	5.5793	7.8565	3.6858
	62	34.96	34.043	2.3063	1.8145	3.1459	9.6608	43.42	52.688	2.0884	6.1159	8.8701	3.7188
	64	76.955	45.429	2.2396	2.2139	3.3666	12.442	59.621	82.745	2.1426	6.7026	15.361	6.7854
	65	146.22	38.116	2.3602	2.1549	3.1282	9.7069	82.053	86.058	2.2285	6.7878	18.166	4.6402
	66	164.6	41.263	2.5452	2.4035	3.7205	13.876	80.329	85.636	2.2568	9.0887	17.334	4.9378
	69	162.9	60.386	2.5185	2.3291	3.9114	14.778	64.661	127.8	2.374	7.739	17.733	10.203
	Rotation of the bedding from horizontal (°)	Simulated rotation (°)	Knickpoint slope angle(°) - last point with p < 0.05	to 180°	Bedding angle ° (after Cruden, 2003)	Slope type (after Cruden, 2003)
	156	0	55	156	24	cataclinal	Zugspitze case
	171	15	57.5	171	9
	201	45	55	21	21	anaclinal
	216	60	55	36	36
	246	90	50	66	66
	261	105	62	81	81
	276	120	69	96	84	cataclinal
	291	135	69	111	69
	306	150	62	126	54
	321	165	55	141	39
