# Supplementary material for: A temperature-dependent mechanical model to assess the stability of degrading permafrost rock slopes
Source: Copernicus journal article supplement (doi:10.5194/esurf-9-1125-2021), 2021-09-09
Supplement: Supplementary file 3 [file esurf-9-1125-2021-supplement.zip › Dataset S15. Numerical code for UDEC/Zugspitze model/mainshearzone_line_prof2.tab]

xy, main shear zone
8,0
33.411,83.293
34.5234,81.6245
36.9953,78.2257
39.5907,75.1358
43.3604,70.9336
46.2648,67.4112
49.4165,64.0741
52.4445,61.355
