# Supplementary material for: A temperature-dependent mechanical model to assess the stability of degrading permafrost rock slopes
Source: Copernicus journal article supplement (doi:10.5194/esurf-9-1125-2021), 2021-09-09
Supplement: Supplementary file 3 [file esurf-9-1125-2021-supplement.zip › Dataset S15. Numerical code for UDEC/Zugspitze model/Rock layers/ThawLevel0_Line_Prof2.tab]

xy,line0
13,0
-0.9527,48.3484
5.9185,50.3569
14.7982,54.1625
21.6694,63.9936
29.7035,76.5732
32.7691,80.3788
38.7946,77.9475
45.0316,72.5562
53.4885,63.5708
63.7424,49.6169
75.8992,34.1831
84.2504,13.5695
91.7559,-1.4415
