# Supplementary material for: A temperature-dependent mechanical model to assess the stability of degrading permafrost rock slopes
Source: Copernicus journal article supplement (doi:10.5194/esurf-9-1125-2021), 2021-09-09
Supplement: Supplementary file 3 [file esurf-9-1125-2021-supplement.zip › Dataset S15. Numerical code for UDEC/Zugspitze model/Rock layers/ThawLevel1_Line_NewTop.tab]

xy, line1
11,0
-1.42,46.3769
6.1268,48.1676
16.3596,52.2607
23.6505,60.3191
31.1972,74.0055
34.5229,77.0753
38.7439,74.1334
46.8022,66.0751
54.4769,55.5864
63.3027,40.1093
69.1866,24.5042
78.1403,-2.8686
72,-20
