# Supplementary material for: A temperature-dependent mechanical model to assess the stability of degrading permafrost rock slopes
Source: Copernicus journal article supplement (doi:10.5194/esurf-9-1125-2021), 2021-09-09
Supplement: Supplementary file 3 [file esurf-9-1125-2021-supplement.zip › Dataset S15. Numerical code for UDEC/Zugspitze model/Rock layers/ThawLevel2_Line_Prof2.tab]

xy, line2
9,0
-1.5479,42.1558
12.5223,45.7373
26.3366,54.8189
34.0112,67.3542
38.4881,67.9937
45.2673,55.9701
53.9652,39.086
61.7677,19.0041
69.6982,-4.9152
