# Supplementary material for: A temperature-dependent mechanical model to assess the stability of degrading permafrost rock slopes
Source: Copernicus journal article supplement (doi:10.5194/esurf-9-1125-2021), 2021-09-09
Supplement: Supplementary file 3 [file esurf-9-1125-2021-supplement.zip › Dataset S15. Numerical code for UDEC/Zugspitze model/Rock layers/ThawLevel3_Line_NewTop.tab]

xy, line3
8,0
-1.5479,37.8069
14.6967,41.0046
27.8715,49.063
34.7787,56.7376
38.9997,56.4818
42.7091,47.2722
50,25.0158
57.9304,-2.4849
50,-20
