# Supplementary material for: A temperature-dependent mechanical model to assess the stability of degrading permafrost rock slopes
Source: Copernicus journal article supplement (doi:10.5194/esurf-9-1125-2021), 2021-09-09
Supplement: Supplementary file 3 [file esurf-9-1125-2021-supplement.zip › Dataset S15. Numerical code for UDEC/Zugspitze model/Rock layers/ThawLevel4_Line_NewTop.tab]

xy, line4
7,0
-1.8037,32.0509
13.2897,34.3533
27.3599,40.493
34.3949,45.7373
38.7439,41.1325
42.5812,21.5623
48.593,-4.5314
40,-20
