# Supplementary material for: A temperature-dependent mechanical model to assess the stability of degrading permafrost rock slopes
Source: Copernicus journal article supplement (doi:10.5194/esurf-9-1125-2021), 2021-09-09
Supplement: Supplementary file 3 [file esurf-9-1125-2021-supplement.zip › Dataset S15. Numerical code for UDEC/Zugspitze model/Zugspitze_stages5-9_warming_NewTop.dat]

;
;; ALL JOINTS WILL BE FILLED WITH ICE
;
;; Assumption: current joint persistence is 90%
;model restore 'mc_allfrozen_persis90_noice_NewTop.sav'
;
;block contact reset displacement
;
;
;; CHANGE PROPERTIES OF JOINTS: from ice-free to ice-filled state, with persistence of 100%; ALL FROZEN!
;; Shear zone has persistence of 100%
;
;; THAW LEVEL 0: minus 4 degrees
;block contact cmodel assign area stiffness-shear 5000 stiffness-normal 13000 friction 30.5 cohesion 0.7 range group 'Joints=shear zone_ThawLevel0'
;block contact cmodel assign area stiffness-shear 10000 stiffness-normal 26000 friction 30.5 cohesion 0.7 range group 'Joints=K1_ThawLevel0'
;block contact cmodel assign area stiffness-shear 4300 stiffness-normal 11100 friction 30.5 cohesion 0.7 range group 'Joints=K3_ThawLevel0'
;block contact cmodel assign area stiffness-shear 5000 stiffness-normal 13000 friction 30.5 cohesion 0.7 range group 'Joints=K4_ThawLevel0'
;
;
;; THAW LEVEL 1: minus 4 degrees
;block contact cmodel assign area stiffness-shear 5000 stiffness-normal 13000 friction 30.5 cohesion 0.7 range group 'Joints=shear zone_ThawLevel1'
;block contact cmodel assign area stiffness-shear 10000 stiffness-normal 26000 friction 30.5 cohesion 0.7 range group 'Joints=K1_ThawLevel1'
;block contact cmodel assign area stiffness-shear 4300 stiffness-normal 11100 friction 30.5 cohesion 0.7 range group 'Joints=K3_ThawLevel1'
;block contact cmodel assign area stiffness-shear 5000 stiffness-normal 13000 friction 30.5 cohesion 0.7 range group 'Joints=K4_ThawLevel1'
;
;
;; THAW LEVEL 2: minus 4 degrees
;block contact cmodel assign area stiffness-shear 5000 stiffness-normal 13000 friction 30.5 cohesion 0.7 range group 'Joints=shear zone_ThawLevel2'
;block contact cmodel assign area stiffness-shear 10000 stiffness-normal 26000 friction 30.5 cohesion 0.7 range group 'Joints=K1_ThawLevel2'
;block contact cmodel assign area stiffness-shear 4300 stiffness-normal 11100 friction 30.5 cohesion 0.7 range group 'Joints=K3_ThawLevel2'
;block contact cmodel assign area stiffness-shear 5000 stiffness-normal 13000 friction 30.5 cohesion 0.7 range group 'Joints=K4_ThawLevel2'
;
;
;; THAW LEVEL 3: minus 4 degrees
;block contact cmodel assign area stiffness-shear 10000 stiffness-normal 26000 friction 30.5 cohesion 0.7 range group 'Joints=K1_ThawLevel3'
;block contact cmodel assign area stiffness-shear 4300 stiffness-normal 11100 friction 30.5 cohesion 0.7 range group 'Joints=K3_ThawLevel3'
;block contact cmodel assign area stiffness-shear 5000 stiffness-normal 13000 friction 30.5 cohesion 0.7 range group 'Joints=K4_ThawLevel3'
;
;
;; THAW LEVEL 4: minus 4 degrees
;block contact cmodel assign area stiffness-shear 10000 stiffness-normal 26000 friction 30.5 cohesion 0.7 range group 'Joints=K1_ThawLevel4'
;block contact cmodel assign area stiffness-shear 4300 stiffness-normal 11100 friction 30.5 cohesion 0.7 range group 'Joints=K3_ThawLevel4'
;block contact cmodel assign area stiffness-shear 5000 stiffness-normal 13000 friction 30.5 cohesion 0.7 range group 'Joints=K4_ThawLevel4'
;;
;
;; FROZEN CORE: minus 4 degrees
;block contact cmodel assign area stiffness-shear 10000 stiffness-normal 26000 friction 30.5 cohesion 0.7 range group 'Joints=K1_frozen'
;block contact cmodel assign area stiffness-shear 4300 stiffness-normal 11100 friction 30.5 cohesion 0.7 range group 'Joints=K3_frozen'
;block contact cmodel assign area stiffness-shear 5000 stiffness-normal 13000 friction 30.5 cohesion 0.7 range group 'Joints=K4_frozen'
;
;;
;;
;block cycle 3000
;model save 'mc_warming0_persis100_icefilled_NewTop.sav'

model restore 'mc_warming0_persis100_icefilled_NewTop.sav'
block factor-of-safety bracket 1 3 filename 'mc_warming0_persis100_icefilled_NewTop_FoS.sav'
model save 'mc_warming0_persis100_icefilled_NewTop_FoS.sav'

;
;;-------------------------------------------------------------------------------------
;; WARMING STEP 1
;
;
;model restore 'mc_warming0_persis100_icefilled_NewTop.sav'
;
;block contact reset displacement
;
;
;; CHANGE PROPERTIES OF JOINTS: with persistence of 100%
;; Shear zone has persistence of 100%
;
;; THAW LEVEL 0: minus 3 degrees
;block contact cmodel assign area stiffness-shear 5000 stiffness-normal 13000 friction 26.4 cohesion 0.5 range group 'Joints=shear zone_ThawLevel0'
;block contact cmodel assign area stiffness-shear 10000 stiffness-normal 26000 friction 26.4 cohesion 0.5 range group 'Joints=K1_ThawLevel0'
;block contact cmodel assign area stiffness-shear 4300 stiffness-normal 11100 friction 26.4 cohesion 0.5 range group 'Joints=K3_ThawLevel0'
;block contact cmodel assign area stiffness-shear 5000 stiffness-normal 13000 friction 26.4 cohesion 0.5 range group 'Joints=K4_ThawLevel0'
;;
;
;block cycle 3000
;model save 'mc_warming1_persis100_icefilled_NewTop.sav'
;
;
;
;;---------------------------------------------------------
;; WARMING STEP 2
;
;
;model restore 'mc_warming1_persis100_icefilled_NewTop.sav'
;
;block contact reset displacement
;
;
;; CHANGE PROPERTIES OF JOINTS: with persistence of 100%
;; Shear zone has persistence of 100%
;
;; THAW LEVEL 0: minus 2 degrees
;block contact cmodel assign area stiffness-shear 5000 stiffness-normal 13000 friction 22 cohesion 0.4 range group 'Joints=shear zone_ThawLevel0'
;block contact cmodel assign area stiffness-shear 10000 stiffness-normal 26000 friction 22 cohesion 0.4 range group 'Joints=K1_ThawLevel0'
;block contact cmodel assign area stiffness-shear 4300 stiffness-normal 11100 friction 22 cohesion 0.4 range group 'Joints=K3_ThawLevel0'
;block contact cmodel assign area stiffness-shear 5000 stiffness-normal 13000 friction 22 cohesion 0.4 range group 'Joints=K4_ThawLevel0'
;
;
;; THAW LEVEL 1: minus 3 degrees
;block contact cmodel assign area stiffness-shear 5000 stiffness-normal 13000 friction 26.4 cohesion 0.5 range group 'Joints=shear zone_ThawLevel1'
;block contact cmodel assign area stiffness-shear 10000 stiffness-normal 26000 friction 26.4 cohesion 0.5 range group 'Joints=K1_ThawLevel1'
;block contact cmodel assign area stiffness-shear 4300 stiffness-normal 11100 friction 26.4 cohesion 0.5 range group 'Joints=K3_ThawLevel1'
;block contact cmodel assign area stiffness-shear 5000 stiffness-normal 13000 friction 26.4 cohesion 0.5 range group 'Joints=K4_ThawLevel1'
;
;;
;;
;block cycle 3000
;model save 'mc_warming2_persis100_icefilled_NewTop.sav'
;
;
;
;;---------------------------------------------------------
;; WARMING STEP 3
;
;
;model restore 'mc_warming2_persis100_icefilled_NewTop.sav'
;
;block contact reset displacement
;
;
;; CHANGE PROPERTIES OF JOINTS: with persistence of 100%
;; Shear zone has persistence of 100%
;
;; THAW LEVEL 0: minus 1 degrees
;block contact cmodel assign area stiffness-shear 5000 stiffness-normal 13000 friction 16.8 cohesion 0.3 range group 'Joints=shear zone_ThawLevel0'
;block contact cmodel assign area stiffness-shear 10000 stiffness-normal 26000 friction 16.8 cohesion 0.3 range group 'Joints=K1_ThawLevel0'
;block contact cmodel assign area stiffness-shear 4300 stiffness-normal 11100 friction 16.8 cohesion 0.3 range group 'Joints=K3_ThawLevel0'
;block contact cmodel assign area stiffness-shear 5000 stiffness-normal 13000 friction 16.8 cohesion 0.3 range group 'Joints=K4_ThawLevel0'
;
;
;; THAW LEVEL 1: minus 2 degrees
;block contact cmodel assign area stiffness-shear 5000 stiffness-normal 13000 friction 22 cohesion 0.4 range group 'Joints=shear zone_ThawLevel1'
;block contact cmodel assign area stiffness-shear 10000 stiffness-normal 26000 friction 22 cohesion 0.4 range group 'Joints=K1_ThawLevel1'
;block contact cmodel assign area stiffness-shear 4300 stiffness-normal 11100 friction 22 cohesion 0.4 range group 'Joints=K3_ThawLevel1'
;block contact cmodel assign area stiffness-shear 5000 stiffness-normal 13000 friction 22 cohesion 0.4 range group 'Joints=K4_ThawLevel1'
;
;
;; THAW LEVEL 2: minus 3 degrees
;block contact cmodel assign area stiffness-shear 5000 stiffness-normal 13000 friction 26.4 cohesion 0.5 range group 'Joints=shear zone_ThawLevel1'
;block contact cmodel assign area stiffness-shear 10000 stiffness-normal 26000 friction 26.4 cohesion 0.5 range group 'Joints=K1_ThawLevel2'
;block contact cmodel assign area stiffness-shear 4300 stiffness-normal 11100 friction 26.4 cohesion 0.5 range group 'Joints=K3_ThawLevel2'
;block contact cmodel assign area stiffness-shear 5000 stiffness-normal 13000 friction 26.4 cohesion 0.5 range group 'Joints=K4_ThawLevel2'
;
;;
;;
;block cycle 3000
;model save 'mc_warming3_persis100_icefilled_NewTop.sav'
;
;
;
;;---------------------------------------------------------
;; WARMING STEP 4
;
;
;model restore 'mc_warming3_persis100_icefilled_NewTop.sav'
;
;block contact reset displacement
;
;
;; CHANGE PROPERTIES OF JOINTS: with persistence of 100%, LAST STAGE wit ALL FROZEN!
;; Shear zone has persistence of 100%
;
;; THAW LEVEL 0: minus 0.5 degrees
;block contact cmodel assign area stiffness-shear 5000 stiffness-normal 13000 friction 13.5 cohesion 0.2 range group 'Joints=shear zone_ThawLevel0'
;block contact cmodel assign area stiffness-shear 10000 stiffness-normal 26000 friction 13.5 cohesion 0.2 range group 'Joints=K1_ThawLevel0'
;block contact cmodel assign area stiffness-shear 4300 stiffness-normal 11100 friction 13.5 cohesion 0.2 range group 'Joints=K3_ThawLevel0'
;block contact cmodel assign area stiffness-shear 5000 stiffness-normal 13000 friction 13.5 cohesion 0.2 range group 'Joints=K4_ThawLevel0'
;
;
;; THAW LEVEL 1: minus 1 degrees
;block contact cmodel assign area stiffness-shear 5000 stiffness-normal 13000 friction 16.8 cohesion 0.3 range group 'Joints=shear zone_ThawLevel1'
;block contact cmodel assign area stiffness-shear 10000 stiffness-normal 26000 friction 16.8 cohesion 0.3 range group 'Joints=K1_ThawLevel1'
;block contact cmodel assign area stiffness-shear 4300 stiffness-normal 11100 friction 16.8 cohesion 0.3 range group 'Joints=K3_ThawLevel1'
;block contact cmodel assign area stiffness-shear 5000 stiffness-normal 13000 friction 16.8 cohesion 0.3 range group 'Joints=K4_ThawLevel1'
;
;
;; THAW LEVEL 2: minus 2 degrees
;block contact cmodel assign area stiffness-shear 5000 stiffness-normal 13000 friction 22 cohesion 0.4 range group 'Joints=shear zone_ThawLevel2'
;block contact cmodel assign area stiffness-shear 10000 stiffness-normal 26000 friction 22 cohesion 0.4 range group 'Joints=K1_ThawLevel2'
;block contact cmodel assign area stiffness-shear 4300 stiffness-normal 11100 friction 22 cohesion 0.4 range group 'Joints=K3_ThawLevel2'
;block contact cmodel assign area stiffness-shear 5000 stiffness-normal 13000 friction 22 cohesion 0.4 range group 'Joints=K4_ThawLevel2'
;
;
;; THAW LEVEL 3: minus 3 degrees
;block contact cmodel assign area stiffness-shear 10000 stiffness-normal 26000 friction 26.4 cohesion 0.5 range group 'Joints=K1_ThawLevel3'
;block contact cmodel assign area stiffness-shear 4300 stiffness-normal 11100 friction 26.4 cohesion 0.5 range group 'Joints=K3_ThawLevel3'
;block contact cmodel assign area stiffness-shear 5000 stiffness-normal 13000 friction 26.4 cohesion 0.5 range group 'Joints=K4_ThawLevel3'
;
;
;;
;block cycle 3000
;model save 'mc_warming4_persis100_icefilled_NewTop.sav'


model restore 'mc_warming4_persis100_icefilled_NewTop.sav'
block factor-of-safety bracket 1 3 filename 'mc_warming4_persis100_icefilled_NewTop_fos.sav'
model save 'mc_warming4_persis100_icefilled_NewTop_fos.sav'

return
