# Supplementary material for: A temperature-dependent mechanical model to assess the stability of degrading permafrost rock slopes
Source: Copernicus journal article supplement (doi:10.5194/esurf-9-1125-2021), 2021-09-09
Supplement: Supplementary file 3 [file esurf-9-1125-2021-supplement.zip › Dataset S15. Numerical code for UDEC/Zugspitze model/Zugspitze_stages10-15_thawing_D=1.dat]

model restore 'mc_warming4_persis100_icefilled_D=1.sav'

block contact reset displacement


; CHANGE PROPERTIES OF JOINTS with thawing
; Joint persistence is 100%

; THAW LEVEL 0: Unfrozen
; SHEAR ZONE same values as K4 (Joint persistence of 100%)
block contact cmodel assign area stiffness-shear 1900 stiffness-normal 5000 friction 29.3 cohesion 0 range group 'Joints=shear zone_ThawLevel0'
block contact cmodel assign area stiffness-shear 3900 stiffness-normal 10100 friction 29.3 cohesion 0 range group 'Joints=K1_ThawLevel0'
block contact cmodel assign area stiffness-shear 1700 stiffness-normal 4300 friction 29.3 cohesion 0 range group 'Joints=K3_ThawLevel0'
block contact cmodel assign area stiffness-shear 1900 stiffness-normal 5000 friction 29.3 cohesion 0 range group 'Joints=K4_ThawLevel0'

; CHANGE PROPERTIES OF ROCK MASS
; THAW LEVEL 1: Unfrozen
block zone cmodel assign mohr-coulomb density 0.0027 bulk 9400 shear 4400 cohesion 3.3 tension 0.4 friction 44 range group 'zRock mass=ThawLevel0'

;
block cycle 5000
model save 'mc_thawLevel0_persis100_icefilled_residfric_D=1.sav'


block factor-of-safety bracket 0.5 6 filename 'mc_thawLevel0_persis100_icefilled_residfric_D=1_FoS.sav'
model save 'mc_thawLevel0_persis100_icefilled_residfric_D=1_FoS.sav'


; --------------------------------------------------------------------


model restore 'mc_thawLevel0_persis100_icefilled_residfric_D=1.sav'

block contact reset displacement


; CHANGE PROPERTIES OF JOINTS with thawing
; Joint persistence is 100%

; THAW LEVEL 1: Unfrozen
; SHEAR ZONE same values as K4 (Joint persistence of 100%)
block contact cmodel assign area stiffness-shear 1900 stiffness-normal 5000 friction 29.3 cohesion 0 range group 'Joints=shear zone_ThawLevel1'
block contact cmodel assign area stiffness-shear 3900 stiffness-normal 10100 friction 29.3 cohesion 0 range group 'Joints=K1_ThawLevel1'
block contact cmodel assign area stiffness-shear 1700 stiffness-normal 4300 friction 29.3 cohesion 0 range group 'Joints=K3_ThawLevel1'
block contact cmodel assign area stiffness-shear 1900 stiffness-normal 5000 friction 29.3 cohesion 0 range group 'Joints=K4_ThawLevel1'


; CHANGE PROPERTIES OF ROCK MASS
; THAW LEVEL 1: Unfrozen
block zone cmodel assign mohr-coulomb density 0.0027 bulk 9400 shear 4400 cohesion 3.3 tension 0.4 friction 44 range group 'zRock mass=ThawLevel1'


block cycle 5000
model save 'mc_thawLevel1_persis100_icefilled_residfric_D=1.sav'


block factor-of-safety bracket 0.5 6 filename 'mc_thawLevel1_persis100_icefilled_residfric_D=1_FoS.sav'
model save 'mc_thawLevel1_persis100_icefilled_residfric_D=1_FoS.sav'


; --------------------------------------------------------------------


model restore 'mc_thawLevel1_persis100_icefilled_residfric_D=1.sav'

block contact reset displacement

; CHANGE PROPERTIES OF JOINTS with persistence of 100%

; THAW LEVEL 2: Unfrozen
; SHEAR ZONE same values as K4 (Joint persistence of 100%)
block contact cmodel assign area stiffness-shear 1900 stiffness-normal 5000 friction 29.3 cohesion 0 range group 'Joints=shear zone_ThawLevel2'
block contact cmodel assign area stiffness-shear 3900 stiffness-normal 10100 friction 29.3 cohesion 0 range group 'Joints=K1_ThawLevel2'
block contact cmodel assign area stiffness-shear 1700 stiffness-normal 4300 friction 29.3 cohesion 0 range group 'Joints=K3_ThawLevel2'
block contact cmodel assign area stiffness-shear 1900 stiffness-normal 5000 friction 29.3 cohesion 0 range group 'Joints=K4_ThawLevel2'


; CHANGE PROPERTIES OF ROCK MASS
; THAW LEVEL 2: Unfrozen
block zone cmodel assign mohr-coulomb density 0.0027 bulk 9400 shear 4400 cohesion 3.3 tension 0.4 friction 44 range group 'zRock mass=ThawLevel2'
;
;
block cycle 5000
model save 'mc_thawLevel2_persis100_icefilled_residfric_D=1.sav'


; --------------------------------------------------------------------


model restore 'mc_thawLevel2_persis100_icefilled_residfric_D=1.sav'

block contact reset displacement


; CHANGE PROPERTIES OF JOINTS with persistence of 100%

; THAW LEVEL 3: Unfrozen
; SHEAR ZONE same values as K4 (Joint persistence of 100%)
block contact cmodel assign area stiffness-shear 3900 stiffness-normal 10100 friction 29.3 cohesion 0 range group 'Joints=K1_ThawLevel3'
block contact cmodel assign area stiffness-shear 1700 stiffness-normal 4300 friction 29.3 cohesion 0 range group 'Joints=K3_ThawLevel3'
block contact cmodel assign area stiffness-shear 1900 stiffness-normal 5000 friction 29.3 cohesion 0 range group 'Joints=K4_ThawLevel3'


; CHANGE PROPERTIES OF ROCK MASS
; THAW LEVEL 3: Unfrozen
block zone cmodel assign mohr-coulomb density 0.0027 bulk 9400 shear 4400 cohesion 3.3 tension 0.4 friction 44 range group 'zRock mass=ThawLevel3'

;
;
block cycle 5000
model save 'mc_thawLevel3_persis100_icefilled_residfric_D=1.sav'


; --------------------------------------------------------------------


model restore 'mc_thawLevel3_persis100_icefilled_residfric_D=1.sav'

block contact reset displacement


; CHANGE PROPERTIES OF JOINTS with persistence of 100%

; THAW LEVEL 4: Unfrozen
; SHEAR ZONE same values as K4 (Joint persistence of 100%)
block contact cmodel assign area stiffness-shear 3900 stiffness-normal 10100 friction 29.3 cohesion 0 range group 'Joints=K1_ThawLevel4'
block contact cmodel assign area stiffness-shear 1700 stiffness-normal 4300 friction 29.3 cohesion 0 range group 'Joints=K3_ThawLevel4'
block contact cmodel assign area stiffness-shear 1900 stiffness-normal 5000 friction 29.3 cohesion 0 range group 'Joints=K4_ThawLevel4'


; CHANGE PROPERTIES OF ROCK MASS
; THAW LEVEL 4: Unfrozen
block zone cmodel assign mohr-coulomb density 0.0027 bulk 9400 shear 4400 cohesion 3.3 tension 0.4 friction 44 range group 'zRock mass=ThawLevel4'

;
;
block cycle 5000
model save 'mc_thawLevel4_persis100_icefilled_residfric_D=1.sav'


; --------------------------------------------------------------------


model restore 'mc_thawLevel4_persis100_icefilled_residfric_D=1.sav'

block contact reset displacement


; CHANGE PROPERTIES OF JOINTS with persistence of 90%

; FROZEN CORE: Unfrozen
; SHEAR ZONE same values as K4 (Joint persistence of 100%)
block contact cmodel assign area stiffness-shear 3900 stiffness-normal 10100 friction 29.3 cohesion 0 range group 'Joints=K1_frozen'
block contact cmodel assign area stiffness-shear 1700 stiffness-normal 4300 friction 29.3 cohesion 0 range group 'Joints=K3_frozen'
block contact cmodel assign area stiffness-shear 1900 stiffness-normal 5000 friction 29.3 cohesion 0 range group 'Joints=K4_frozen'


; CHANGE PROPERTIES OF ROCK MASS
; FROZEN CORE: Unfrozen
block zone cmodel assign mohr-coulomb density 0.0027 bulk 9400 shear 4400 cohesion 3.3 tension 0.4 friction 44 range group 'zRock mass=frozen'

;
block cycle 5000
model save 'mc_allunfrozen_persis100_icefilled_residfric_D=1.sav'


block factor-of-safety bracket 0.5 6 filename 'mc_allunfrozen_persis100_icefilled_residfric_D=1_FoS.sav'
model save 'mc_allunfrozen_persis100_icefilled_residfric_D=1_FoS.sav'

return
