# Supplementary material for: A temperature-dependent mechanical model to assess the stability of degrading permafrost rock slopes
Source: Copernicus journal article supplement (doi:10.5194/esurf-9-1125-2021), 2021-09-09
Supplement: Supplementary file 3 [file esurf-9-1125-2021-supplement.zip › Dataset S15. Numerical code for UDEC/Zugspitze model/Zugspitze_stages10-15_thawing_NewTop.dat]

;
;model restore 'mc_warming4_persis100_icefilled_NewTop.sav'
;
;block contact reset displacement
;
;
;; CHANGE PROPERTIES OF JOINTS with thawing
;; Joint persistence is 100%
;
;; THAW LEVEL 0: Unfrozen
;; SHEAR ZONE same values as K4 (Joint persistence of 100%)
;block contact cmodel assign area stiffness-shear 4900 stiffness-normal 12600 friction 29.3 cohesion 0 range group 'Joints=shear zone_ThawLevel0'
;block contact cmodel assign area stiffness-shear 9900 stiffness-normal 25300 friction 29.3 cohesion 0 range group 'Joints=K1_ThawLevel0'
;block contact cmodel assign area stiffness-shear 4200 stiffness-normal 10800 friction 29.3 cohesion 0 range group 'Joints=K3_ThawLevel0'
;block contact cmodel assign area stiffness-shear 4900 stiffness-normal 12600 friction 29.3 cohesion 0 range group 'Joints=K4_ThawLevel0'
;
;; CHANGE PROPERTIES OF ROCK MASS
;; THAW LEVEL 1: Unfrozen
;block zone cmodel assign mohr-coulomb density 0.0027 bulk 18900 shear 8700 cohesion 3.3 tension 0.7 friction 44 range group 'zRock mass=ThawLevel0'
;
;;
;block cycle 5000
;model save 'mc_thawLevel0_persis100_icefilled_residfric_NewTop.sav'
;

model restore 'mc_thawLevel0_persis100_icefilled_residfric_NewTop.sav'
block factor-of-safety bracket 0.5 1.5 filename 'mc_thawLevel0_persis100_icefilled_residfric_NewTop_FoS.sav'
model save 'mc_thawLevel0_persis100_icefilled_residfric_NewTop_FoS.sav'


; --------------------------------------------------------------------
;
;
;model restore 'mc_thawLevel0_persis100_icefilled_residfric_NewTop.sav'
;
;block contact reset displacement
;
;
;; CHANGE PROPERTIES OF JOINTS with thawing
;; Joint persistence is 100%
;
;; THAW LEVEL 1: Unfrozen
;; SHEAR ZONE same values as K4 (Joint persistence of 100%)
;block contact cmodel assign area stiffness-shear 4900 stiffness-normal 12600 friction 29.3 cohesion 0 range group 'Joints=shear zone_ThawLevel1'
;block contact cmodel assign area stiffness-shear 9900 stiffness-normal 25300 friction 29.3 cohesion 0 range group 'Joints=K1_ThawLevel1'
;block contact cmodel assign area stiffness-shear 4200 stiffness-normal 10800 friction 29.3 cohesion 0 range group 'Joints=K3_ThawLevel1'
;block contact cmodel assign area stiffness-shear 4900 stiffness-normal 12600 friction 29.3 cohesion 0 range group 'Joints=K4_ThawLevel1'
;
;
;; CHANGE PROPERTIES OF ROCK MASS
;; THAW LEVEL 1: Unfrozen
;block zone cmodel assign mohr-coulomb density 0.0027 bulk 18900 shear 8700 cohesion 3.3 tension 0.7 friction 44 range group 'zRock mass=ThawLevel1'
;
;
;
;block cycle 5000
;model save 'mc_thawLevel1_persis100_icefilled_residfric_NewTop.sav'


model restore 'mc_thawLevel1_persis100_icefilled_residfric_NewTop.sav'
block factor-of-safety bracket 0.5 1.5 filename 'mc_thawLevel1_persis100_icefilled_residfric_NewTop_FoS.sav'
model save 'mc_thawLevel1_persis100_icefilled_residfric_NewTop_FoS.sav'


;
;; --------------------------------------------------------------------
;
;
;model restore 'mc_thawLevel1_persis100_icefilled_residfric_NewTop.sav'
;
;block contact reset displacement
;
;; CHANGE PROPERTIES OF JOINTS with persistence of 100%
;
;; THAW LEVEL 2: Unfrozen
;; SHEAR ZONE same values as K4 (Joint persistence of 100%)
;block contact cmodel assign area stiffness-shear 4900 stiffness-normal 12600 friction 29.3 cohesion 0 range group 'Joints=shear zone_ThawLevel2'
;block contact cmodel assign area stiffness-shear 9900 stiffness-normal 25300 friction 29.3 cohesion 0 range group 'Joints=K1_ThawLevel2'
;block contact cmodel assign area stiffness-shear 4200 stiffness-normal 10800 friction 29.3 cohesion 0 range group 'Joints=K3_ThawLevel2'
;block contact cmodel assign area stiffness-shear 4900 stiffness-normal 12600 friction 29.3 cohesion 0 range group 'Joints=K4_ThawLevel2'
;
;
;; CHANGE PROPERTIES OF ROCK MASS
;; THAW LEVEL 2: Unfrozen
;block zone cmodel assign mohr-coulomb density 0.0027 bulk 18900 shear 8700 cohesion 3.3 tension 0.7 friction 44 range group 'zRock mass=ThawLevel2'
;;
;;
;block cycle 5000
;model save 'mc_thawLevel2_persis100_icefilled_residfric_NewTop.sav'
;
;
;
;; --------------------------------------------------------------------
;
;
;model restore 'mc_thawLevel2_persis100_icefilled_residfric_NewTop.sav'
;
;block contact reset displacement
;
;
;; CHANGE PROPERTIES OF JOINTS with persistence of 100%
;
;; THAW LEVEL 3: Unfrozen
;; SHEAR ZONE same values as K4 (Joint persistence of 100%)
;block contact cmodel assign area stiffness-shear 9900 stiffness-normal 25300 friction 29.3 cohesion 0 range group 'Joints=K1_ThawLevel3'
;block contact cmodel assign area stiffness-shear 4200 stiffness-normal 10800 friction 29.3 cohesion 0 range group 'Joints=K3_ThawLevel3'
;block contact cmodel assign area stiffness-shear 4900 stiffness-normal 12600 friction 29.3 cohesion 0 range group 'Joints=K4_ThawLevel3'
;
;
;; CHANGE PROPERTIES OF ROCK MASS
;; THAW LEVEL 3: Unfrozen
;block zone cmodel assign mohr-coulomb density 0.0027 bulk 18900 shear 8700 cohesion 3.3 tension 0.7 friction 44 range group 'zRock mass=ThawLevel3'
;
;;
;;
;block cycle 5000
;model save 'mc_thawLevel3_persis100_icefilled_residfric_NewTop.sav'
;
;
;
;; --------------------------------------------------------------------
;
;
;model restore 'mc_thawLevel3_persis100_icefilled_residfric_NewTop.sav'
;
;block contact reset displacement
;
;
;; CHANGE PROPERTIES OF JOINTS with persistence of 100%
;
;; THAW LEVEL 4: Unfrozen
;; SHEAR ZONE same values as K4 (Joint persistence of 100%)
;block contact cmodel assign area stiffness-shear 9900 stiffness-normal 25300 friction 29.3 cohesion 0 range group 'Joints=K1_ThawLevel4'
;block contact cmodel assign area stiffness-shear 4200 stiffness-normal 10800 friction 29.3 cohesion 0 range group 'Joints=K3_ThawLevel4'
;block contact cmodel assign area stiffness-shear 4900 stiffness-normal 12600 friction 29.3 cohesion 0 range group 'Joints=K4_ThawLevel4'
;
;
;; CHANGE PROPERTIES OF ROCK MASS
;; THAW LEVEL 4: Unfrozen
;block zone cmodel assign mohr-coulomb density 0.0027 bulk 18900 shear 8700 cohesion 3.3 tension 0.7 friction 44 range group 'zRock mass=ThawLevel4'
;
;;
;;
;block cycle 5000
;model save 'mc_thawLevel4_persis100_icefilled_residfric_NewTop.sav'
;
;
;
;; --------------------------------------------------------------------
;
;
;model restore 'mc_thawLevel4_persis100_icefilled_residfric_NewTop.sav'
;
;block contact reset displacement
;
;
;; CHANGE PROPERTIES OF JOINTS with persistence of 90%
;
;; FROZEN CORE: Unfrozen
;; SHEAR ZONE same values as K4 (Joint persistence of 100%)
;block contact cmodel assign area stiffness-shear 9900 stiffness-normal 25300 friction 29.3 cohesion 0 range group 'Joints=K1_frozen'
;block contact cmodel assign area stiffness-shear 4200 stiffness-normal 10800 friction 29.3 cohesion 0 range group 'Joints=K3_frozen'
;block contact cmodel assign area stiffness-shear 4900 stiffness-normal 12600 friction 29.3 cohesion 0 range group 'Joints=K4_frozen'
;
;
;; CHANGE PROPERTIES OF ROCK MASS
;; FROZEN CORE: Unfrozen
;block zone cmodel assign mohr-coulomb density 0.0027 bulk 18900 shear 8700 cohesion 3.3 tension 0.7 friction 44 range group 'zRock mass=frozen'
;
;;
;block cycle 5000
;model save 'mc_allunfrozen_persis100_icefilled_residfric_NewTop.sav'


model restore 'mc_allunfrozen_persis100_icefilled_residfric_NewTop.sav'
block factor-of-safety bracket 0.5 1.5 filename 'mc_allunfrozen_persis100_icefilled_residfric_NewTop_FoS.sav'
model save 'mc_allunfrozen_persis100_icefilled_residfric_NewTop_FoS.sav'

return
