# Supplementary material for: A temperature-dependent mechanical model to assess the stability of degrading permafrost rock slopes
Source: Copernicus journal article supplement (doi:10.5194/esurf-9-1125-2021), 2021-09-09
Supplement: Supplementary file 3 [file esurf-9-1125-2021-supplement.zip › Dataset S16. Material parameters for different D_Fig. S6.xlsx]

## Sheet: D = 0
Min and Max values for calculated parameters
	Unfrozen	Frozen	Unfrozen		Frozen
	Average	Average	Average + deviation min	Average + deviation max	Average + deviation min	Average + deviation max
Density	2.7	2.7	2.69	2.71	2.69	2.71
Dilatational wave velo	4950	5560	4550	5350	5510	5610
Poisson´s ratio	0.3	0.3	0.27	0.33	0.29	0.31
Uniax tensile strength	7.2	9	5.3	9.1	7.6	10.4
Uniax compressive strength	91	109	64	118	84	134
mb	2.57854	2.57854	2.57854	2.57854	2.57854	2.57854
s	0.02047	0.02047	0.0204681	0.0204681	0.0204681	0.0204681
GSI	65	65	65	65	65	65
D	0	0	0	0	0	0
mi	9	9	9	9	9	9
			Min	Max	Min	Max
E-modulus intact rock	67.1	84.3	55.6897	77.567	81.6687	85.2894
G-modulus intact rock	25.8077	32.4231	21.9251	29.1605	31.6545	32.5532
K-modulus intact rock	55.9167	70.25	40.3549	76.0461	64.8164	74.8153
E-modulus rock mass	22.6215	24.7579	18.971	25.7597	21.734	27.4506
G-modulus rock mass	8.70056	9.52226	7.46889	9.6841	8.42403	10.4773
K-modulus rock mass	18.8512	20.6316	13.7471	25.2546	17.2492	24.0795
Uniax tensile strength rock mass	-0.720202	-0.86266	-0.506468	-0.933801	-0.66474	-1.06042
Schmidt hammer rebound R	51.9	55	50.9	52.9	54	56
Schmidt hammer rebound r	52.1	53	51.3	52.9	50.9	55.1
Joint basic friction angle	30	38.3	25.3	34.7	33.9	42.7
True spacing K1	1.35	1.35	1.35	1.35	1.35	1.35	5 times bigger than in reality
True spacing K3	3.15	3.15	3.15	3.15	3.15	3.15
True spacing K4	2.7	2.7	2.7	2.7	2.7	2.7
			Min	Max	Min	Max
Joint residual friction angle	30.0771	37.5727	25.4572	34.7	32.7519	42.3786
Joint shear stiffness K1	9722.67	9986.41	8390.93	10740.2	8502.83	11444.4
Joint normal stiffness K1	25278.9	25964.7	21313	28568.9	21937.3	29984.4
Joint shear stiffness K3	4166.86	4279.89	3596.11	4602.94	3644.07	4904.75
Joint normal stiffness K3	10833.8	11127.7	9134.12	12243.8	9401.7	12850.4
Joint shear stiffness K4	4861.34	4993.2	4195.46	5370.09	4251.42	5722.21
Joint normal stiffness K4	12639.5	12982.3	10656.5	14284.4	10968.7	14992.2
			Min	Max
True spacing K1	0.27		-0.03	0.57
True spacing K2	0.8		0.2	1.4
True spacing K3	0.54		-0.06	1.14
True spacing K4	0.59		-0.11	1.29
Joint frequency K1	3.7037		-33.3333	1.75439
Joint frequency K2	1.25		5	0.714286
Joint frequency K3	1.85185		-16.6667	0.877193
Joint frequency K4	1.69492		-9.09091	0.775194
	Temp.	Average	Min	Max
Friction angle rock-ice-rock: -4°C	-4	30.5406	26.1049	34.6057
Friction angle rock-ice-rock: -3°C	-3	26.1049	22.2936	29.6831
Friction angle rock-ice-rock: -2°C	-2	21.3058	18.2629	24.2277
Friction angle rock-ice-rock: -1°C	-1	16.1722	14.0362	18.2629
Friction angle rock-ice-rock: -0.5°C	-0.5	13.4957	11.8598	15.1096
Cohesion rock-ice-rock: -4°C	-4	0.6797	0.45	0.9094
Cohesion rock-ice-rock: -3°C	-3	0.5359	0.3487	0.7231
Cohesion rock-ice-rock: -2°C	-2	0.3921	0.2474	0.5368
Cohesion rock-ice-rock: -1°C	-1	0.2483	0.1461	0.3505
Cohesion rock-ice-rock: -0.5°C	-0.5	0.1764	0.09545	0.25735

## Sheet: D = 1
Min and Max values for calculated parameters
	Unfrozen	Frozen	Unfrozen		Frozen
	Average	Average	Average + deviation min	Average + deviation max	Average + deviation min	Average + deviation max
Density	2.7	2.7	2.69	2.71	2.69	2.71
Dilatational wave velo	4950	5560	4550	5350	5510	5610
Poisson´s ratio	0.3	0.3	0.27	0.33	0.29	0.31
Uniax tensile strength	7.2	9	5.3	9.1	7.6	10.4
Uniax compressive strength	91	109	64	118	84	134
mb	0.738765	0.738765	2.57854	2.57854	2.57854	2.57854
s	0.0029283	0.0029283	0.0204681	0.0204681	0.0204681	0.0204681
GSI	65	65	65	65	65	65
D	1	1	0	0	0	0
mi	9	9	9	9	9	9
			Min	Max	Min	Max
E-modulus intact rock	67.1	84.3	55.6897	77.567	81.6687	85.2894
G-modulus intact rock	25.8077	32.4231	21.9251	29.1605	31.6545	32.5532
K-modulus intact rock	55.9167	70.25	40.3549	76.0461	64.8164	74.8153
E-modulus rock mass	11.3107	12.3789	18.971	25.7597	21.734	27.4506
G-modulus rock mass	4.35028	4.76113	7.46889	9.6841	8.42403	10.4773
K-modulus rock mass	9.42561	10.3158	13.7471	25.2546	17.2492	24.0795
Uniax tensile strength rock mass	-0.358789	-0.429758	-0.506468	-0.933801	-0.66474	-1.06042
Schmidt hammer rebound R	51.9	55	50.9	52.9	54	56
Schmidt hammer rebound r	52.1	53	51.3	52.9	50.9	55.1
Joint basic friction angle	30	38.3	25.3	34.7	33.9	42.7
True spacing K1	1.35	1.35	1.35	1.35	1.35	1.35	5 times bigger than in reality
True spacing K3	3.15	3.15	3.15	3.15	3.15	3.15
True spacing K4	2.7	2.7	2.7	2.7	2.7	2.7
			Min	Max	Min	Max
Joint residual friction angle	30.0771	37.5727	25.4572	34.7	32.7519	42.3786
Joint shear stiffness K1	3875.75	4133.78	8390.93	10740.2	8502.83	11444.4
Joint normal stiffness K1	10076.9	10747.8	21313	28568.9	21937.3	29984.4
Joint shear stiffness K3	1661.03	1771.62	3596.11	4602.94	3644.07	4904.75
Joint normal stiffness K3	4318.69	4606.21	9134.12	12243.8	9401.7	12850.4
Joint shear stiffness K4	1937.87	2066.89	4195.46	5370.09	4251.42	5722.21
Joint normal stiffness K4	5038.47	5373.92	10656.5	14284.4	10968.7	14992.2
			Min	Max
True spacing K1	0.27		-0.03	0.57
True spacing K2	0.8		0.2	1.4
True spacing K3	0.54		-0.06	1.14
True spacing K4	0.59		-0.11	1.29
Joint frequency K1	3.7037		-33.3333	1.75439
Joint frequency K2	1.25		5	0.714286
Joint frequency K3	1.85185		-16.6667	0.877193
Joint frequency K4	1.69492		-9.09091	0.775194
	Temp.	Average	Min	Max
Friction angle rock-ice-rock: -4°C	-4	30.5406	26.1049	34.6057
Friction angle rock-ice-rock: -3°C	-3	26.1049	22.2936	29.6831
Friction angle rock-ice-rock: -2°C	-2	21.3058	18.2629	24.2277
Friction angle rock-ice-rock: -1°C	-1	16.1722	14.0362	18.2629
Friction angle rock-ice-rock: -0.5°C	-0.5	13.4957	11.8598	15.1096
Cohesion rock-ice-rock: -4°C	-4	0.6797	0.45	0.9094
Cohesion rock-ice-rock: -3°C	-3	0.5359	0.3487	0.7231
Cohesion rock-ice-rock: -2°C	-2	0.3921	0.2474	0.5368
Cohesion rock-ice-rock: -1°C	-1	0.2483	0.1461	0.3505
Cohesion rock-ice-rock: -0.5°C	-0.5	0.1764	0.09545	0.25735
